# Supplementary material
Source: publisher site journal article supplement (https://www.dovepress.com/article/423318)
Supplement: Supplementary file 1 [file get_supplementary_file.php]

**Supplementary Table 1**

|                              | Age | Gender | UCSFOCPQ<br>1 | UCSFOCPQ<br>2 | UCSFOCPQ<br>3 | UCSFOCPQ<br>4 |
|------------------------------|-----|--------|---------------|---------------|---------------|---------------|
| <b>Random<br/>Subject ID</b> |     |        |               |               |               |               |
| AA3665                       | 70  | F      | 27            | 97            | 11            | 99            |
| AA7631                       | 66  | F      | 10            | 20            | 3             | 19            |
| AA3177                       | 47  | F      | 12            | 79            | 5             | 93            |
| AA1835                       | 73  | M      | 15            | 51            | 23            | 66            |
| AA6066                       | 87  | M      | 10            | 71            | 21            | 73            |
| AA2647                       | 36  | F      | 59            | 72            | 61            | 76            |
| AA6499                       | 58  | M      | 7             | 83            | 9             | 75            |
| AA9542                       | 83  | F      | 10            | 57            | 13            | 57            |
| AA8350                       | 42  | F      | 11            | 54            | 11            | 63            |
| AA6690                       | 66  | M      | 2             | 5             | 1             | 1             |
| AA5505                       | 77  | M      | 2             | 1             | 1             | 1             |
| AA7174                       | 64  | M      | 1             | 1             | 2             | 2             |
| AA0738                       | 49  | F      | 13            | 29            | 7             | 23            |
| AA7571                       | 50  | M      | 33            | 54            | 25            | 63            |
| AA6851                       | 52  | F      | 59            | 100           | 23            | 100           |
| AA5062                       | 80  | F      | 1             | 62            | 2             | 19            |
| AA9931                       | 60  | F      | 0             | 0             | 0             | 0             |
| AA0164                       | 69  | F      | 0             | 45            | 0             | 30            |
| AA6968                       | 41  | M      | 0             | 43            | 0             | 0             |
| AA3962                       | 66  | F      | 2             | 19            | 2             | 4             |
| AA7296                       | 58  | M      | 0             | 0             | 0             | 0             |
| AA2274                       | 64  | M      | 15            | 14            | 0             | 0             |
| AA2149                       | 68  | F      | 29            | 75            | 40            | 83            |
| AA6907                       | 78  | M      | 15            | 47            | 41            | 55            |
| AA8638                       | 27  | M      | 53            | 53            | 40            | 48            |
| AA8294                       | 92  | M      | 3             | 71            | 5             | 52            |
| AA6848                       | 83  | M      | 0             | 0             | 0             | 0             |
| AA1037                       | 78  | M      | 0             | 0             | 0             | 0             |
| AA3577                       | 54  | F      | 0             | 78            | 14            | 17            |
| AA7376                       | 80  | M      | 48            | 80            | 53            | 53            |

| UCSFOCPQ | UCSFOCPQ | UCSFOCPQ | UCSFOCPQ | UCSFOCPQ | Nodal Status | Tumor Stage |
|----------|----------|----------|----------|----------|--------------|-------------|
| 5        | 6        | 7        | 8        | average  |              |             |
| 4        | 98       | 96       | 97       | 66.125   | N+           | pT4a        |
| 37       | 11       | 34       | 4        | 17.25    | N0           | pT2         |
| 15       | 85       | 88       | 75       | 56.5     | N+           | pT1         |
| 28       | 31       | 85       | 89       | 48.5     | N0           | pT4a        |
| 53       | 35       | 9        | 89       | 45.125   | N0           | cT2         |
| 56       | 56       | 80       | 58       | 64.75    | N0           | pT3         |
| 11       | 84       | 77       | 75       | 52.625   | N+           | pT2         |
| 8        | 41       | 93       | 92       | 46.375   | N0           | pT1         |
| 15       | 43       | 77       | 42       | 39.5     | N+           | pT1         |
| 1        | 4        | 16       | 4        | 4.25     | N0           | pT1         |
| 1        | 1        | 1        | 1        | 1.125    | N0           | pT1         |
| 2        | 2        | 9        | 0        | 2.375    | N0           | pT1         |
| 10       | 14       | 33       | 31       | 20       | N0           | pT3         |
| 13       | 66       | 54       | 74       | 47.75    | N+           | pT2         |
| 69       | 86       | 100      | 96       | 79.125   | N+           | pT2         |
| 2        | 6        | 77       | 80       | 31.125   | N0           | cT1         |
| 0        | 0        | 0        | 0        | 0        | N+           | pT4a        |
| 0        | 0        | 65       | 64       | 25.5     | N0           | pT2         |
| 0        | 12       | 72       | 0        | 15.875   | N0           | pT2         |
| 1        | 19       | 15       | 50       | 14       | N0           | pT1         |
| 0        | 0        | 9        | 0        | 1.125    | N0           | pT1         |
| 16       | 15       | 16       | 17       | 11.625   | N0           | pT1         |
| 43       | 85       | 71       | 56       | 60.25    | N+           | pT3         |
| 2        | 5        | 56       | 20       | 30.125   | N0           | pT1         |
| 31       | 48       | 19       | 56       | 43.5     | N+           | pT4         |
| 24       | 16       | 90       | 88       | 43.625   | N+           | pT4a        |
| 0        | 0        | 58       | 0        | 7.25     | N0           | pT4         |
| 0        | 0        | 0        | 0        | 0        | Nx           | pT2         |
| 17       | 55       | 7        | 65       | 31.625   | N+           | pT4         |
| 64       | 66       | 80       | 95       | 67.375   |              |             |

| Stage | PNI | DOI    | BPI Average<br>Pain Intensity<br>(0-10 scale) | BPI Worst<br>Pain Intensity<br>(0-10 scale) | BPI Number<br>of Hours Pain<br>Lasts on Days<br>with Pain (0-<br>24 hours) |
|-------|-----|--------|-----------------------------------------------|---------------------------------------------|----------------------------------------------------------------------------|
| 4     | Yes | N/A    | 7                                             | 9                                           | 12                                                                         |
| 2     | No  | N/A    | 2                                             | 5                                           | 1                                                                          |
| 3     | No  | N/A    | 2                                             | 8                                           | 10                                                                         |
| 4     | Yes | N/A    | 6                                             | 8                                           | 9                                                                          |
| 2     | No  | 4.5 mm | 5                                             | 9                                           | 18                                                                         |
| 3     | No  | N/A    | 7                                             | 9                                           | N/A                                                                        |
| 3     | No  | 6 mm   | 5                                             | 10                                          | 2                                                                          |
| 1     | No  | 2 mm   | 6                                             | 9                                           | 1.5                                                                        |
| 3     | Yes | 0.5 mm | 5                                             | 8                                           | 12                                                                         |
| 1     | No  | 0.7 mm | 0                                             | 0                                           | 2                                                                          |
| 1     | Yes | 2 mm   | 1                                             | 6                                           | 5                                                                          |
| 1     | No  | 4 mm   | 1                                             | 3                                           | 0                                                                          |
| 3     | Yes | N/A    | 1                                             | 3                                           | 1                                                                          |
| 3     | Yes | 10 mm  | 5                                             | 9                                           | 6                                                                          |
| 3     | Yes | 20 mm  | 10                                            | 10                                          | 24                                                                         |
| 1     | No  | 3 mm   | 4                                             | 9                                           | 1                                                                          |
| 4     | No  | 5.5 mm | 1                                             | 2                                           | 1                                                                          |
| 2     | No  | 9 mm   | 5                                             | 8                                           | 4                                                                          |
| 2     | No  | 7 mm   | 5                                             | 7                                           | 12                                                                         |
| 1     | No  | 4 mm   | 2                                             | 3                                           | 3                                                                          |
| 1     | No  | 2 mm   | 0                                             | 0                                           | 0                                                                          |
| 1     | No  | 1.5 mm | 2                                             | 4                                           | 2                                                                          |
| 3     | Yes | 11 mm  | 5                                             | 7                                           | 1                                                                          |
| 1     | No  | N/A    | 3                                             | 8                                           | 12                                                                         |
| 4     | Yes | 24 mm  | 2                                             | 0                                           | 1                                                                          |
| 4     | No  | 25 mm  | 5                                             | 7                                           | 24                                                                         |
| 4     | Yes | 7 mm   | 0                                             | 0                                           | 0                                                                          |
| 2     | No  | 4.5 mm | 0                                             | 0                                           | 0                                                                          |
| 4     | No  | 10 mm  | 7                                             | 8                                           | 24                                                                         |
|       |     |        | 7                                             | 10                                          | 24                                                                         |

| <b>BPI Number<br/>of Days Pain<br/>Interferes<br/>with Mood<br/>and/or<br/>Activities (0-<br/>7)</b> | <b>BPI Relief<br/>from Pain<br/>Medication in<br/>Past Week (0-<br/>100%)</b> | <b>BPI Overall<br/>Satisfaction<br/>with Pain<br/>Treatment (0-<br/>10)</b> | <b>General<br/>activity</b> | <b>Normal work</b> | <b>Walking<br/>ability</b> |
|------------------------------------------------------------------------------------------------------|-------------------------------------------------------------------------------|-----------------------------------------------------------------------------|-----------------------------|--------------------|----------------------------|
| 7                                                                                                    | 80                                                                            | 7                                                                           | 8                           | 7                  | 1                          |
| 1                                                                                                    | 100                                                                           | 10                                                                          | 1                           | 0                  | 0                          |
| 3                                                                                                    | 80                                                                            | 6                                                                           | 1                           | 4                  | 4                          |
| 7                                                                                                    | 40                                                                            | 5                                                                           | 9                           | 6                  | 9                          |
| 7                                                                                                    | 0                                                                             | 3                                                                           | 0                           | 0                  | 0                          |
| 0                                                                                                    | 70                                                                            | 8                                                                           | 6                           | 0                  | 0                          |
| 5                                                                                                    | 90                                                                            | 9                                                                           | 8                           | 2                  | 2                          |
| 2                                                                                                    | 60                                                                            | 8                                                                           | 3                           | 3                  | 4                          |
| 7                                                                                                    | N/A                                                                           | 3                                                                           | 4                           | 4                  | 0                          |
| 1                                                                                                    | 90                                                                            | 9                                                                           | 4                           | 3                  | 0                          |
| 0                                                                                                    | N/A                                                                           | N/A                                                                         | 0                           | 0                  | 0                          |
| 0                                                                                                    | N/A                                                                           | N/A                                                                         | 0                           | 0                  | 0                          |
| 1                                                                                                    | 90                                                                            | 10                                                                          | 1                           | 0                  | 0                          |
| 7                                                                                                    | 10                                                                            | 7                                                                           | 3                           | 0                  | 0                          |
| 7                                                                                                    | 0                                                                             | 0                                                                           | 9                           | 3                  | 0                          |
| 7                                                                                                    | 70                                                                            | 9                                                                           | 9                           | 2                  | 0                          |
| 0                                                                                                    | N/A                                                                           | N/A                                                                         | 0                           | 0                  | 0                          |
| 7                                                                                                    | 0                                                                             | 5                                                                           | 4                           | 7                  | 7                          |
| 5                                                                                                    | N/A                                                                           | N/A                                                                         | 0                           | 5                  | 0                          |
| 0                                                                                                    | 100                                                                           | 10                                                                          | 0                           | 0                  | 0                          |
| 0                                                                                                    | 100                                                                           | 10                                                                          | 0                           | 0                  | 0                          |
| 1                                                                                                    | 70                                                                            | 7                                                                           | 1                           | 0                  | 0                          |
| 7                                                                                                    | 100                                                                           | 9                                                                           | 5                           | 3                  | 0                          |
| 0                                                                                                    | 80                                                                            | 5                                                                           | 1                           | 0                  | 0                          |
| 7                                                                                                    | N/A                                                                           | 5                                                                           | 5                           | 5                  | 5                          |
| 7                                                                                                    | 70                                                                            | 7                                                                           | 6                           | 9                  | 8                          |
| 0                                                                                                    | N/A                                                                           | N/A                                                                         | 0                           | 0                  | 0                          |
| 0                                                                                                    | N/A                                                                           | N/A                                                                         | 0                           | 0                  | 0                          |
| 7                                                                                                    | 90                                                                            | 10                                                                          | 10                          | 6                  | 0                          |
| 7                                                                                                    | N/A                                                                           | N/A                                                                         | 0                           | 0                  | 0                          |

| Sexual ability | Mood | Relations w/<br>others | Enjoyment of<br>life | Sleep | BPI average<br>pain score |
|----------------|------|------------------------|----------------------|-------|---------------------------|
| 10             | 10   | 8                      | 10                   | 10    | 7.89                      |
| N/A            | 5    | 5                      | 9                    | 9     | 3.88                      |
| N/A            | 7    | 4                      | N/A                  | 9     | 4.43                      |
| 1              | 8    | 5                      | 3                    | 9     | 6.22                      |
| 0              | 0    | 0                      | 0                    | 0     | 0.56                      |
| 0              | 5    | 0                      | 5                    | 6     | 3.22                      |
| 8              | 8    | 4                      | 8                    | 8     | 5.89                      |
| N/A            | 2    | 0                      | 1                    | 6     | 3.13                      |
| 4              | 4    | 2                      | 2                    | 0     | 2.78                      |
| 2              | 5    | 3                      | 2                    | 0     | 2.11                      |
| 0              | 0    | 0                      | 0                    | 1     | 0.22                      |
| 0              | 0    | 0                      | 0                    | 0     | 0.11                      |
| 5              | 1    | 2                      | 1                    | 0     | 1.22                      |
| 4              | 6    | 4                      | 4                    | 0     | 2.89                      |
| N/A            | 10   | 9                      | 9                    | 9     | 7.38                      |
| 0              | 7    | 0                      | 8                    | 3     | 3.67                      |
| 0              | 0    | 0                      | 0                    | 0     | 0.11                      |
| 0              | 3    | 0                      | 8                    | 0     | 3.78                      |
| 0              | 5    | 0                      | 3                    | 0     | 2.00                      |
| 0              | 0    | 0                      | 0                    | 0     | 0.22                      |
| 0              | 0    | 0                      | 0                    | 0     | 0.00                      |
| 0              | 0    | 0                      | 1                    | 0     | 0.44                      |
| 0              | 4    | 0                      | 0                    | 0     | 1.89                      |
| 2              | 3    | 1                      | 2                    | 0     | 1.33                      |
| 5              | 10   | 5                      | 6                    | 7     | 5.56                      |
| 10             | 8    | 10                     | 10                   | 0     | 7.33                      |
| 0              | 0    | 0                      | 0                    | 0     | 0.00                      |
| 0              | 0    | 0                      | 0                    | 0     | 0.00                      |
| 9              | 10   | 2                      | 9                    | 7     | 6.67                      |
| 1              | 0    | 0                      | 5                    | 6     | 2.11                      |

| BPI Occurrence of Pain (0= No; 1= Yes) | BPI Pain Related to Cancer (0= No; 1= Yes) | BPI Pain NOT Related to Cancer (0= No; 1= Yes) | BPI Both Cancer and Non-Cancer Related Pain (0= No; 1= Yes) |        |           |
|----------------------------------------|--------------------------------------------|------------------------------------------------|-------------------------------------------------------------|--------|-----------|
|                                        |                                            |                                                |                                                             | Aching | Throbbing |
| 1                                      | 1                                          | 0                                              | 0                                                           | 1      | 1         |
| 1                                      | 1                                          | 0                                              | 0                                                           | 0      | 1         |
| 1                                      | 1                                          | 1                                              | 1                                                           | 0      | 0         |
| 1                                      | 1                                          | N/A                                            | N/A                                                         | 1      | 1         |
| 1                                      | 1                                          | 0                                              | 0                                                           | 1      | 1         |
| 1                                      | 1                                          | 0                                              | 0                                                           | 1      | 1         |
| 1                                      | 1                                          | 1                                              | 1                                                           | 1      | 1         |
| 1                                      | 1                                          | 1                                              | 1                                                           | 0      | 0         |
| 1                                      | 1                                          | 1                                              | 1                                                           | 1      | 1         |
| 1                                      | 0                                          | 1                                              | 0                                                           | 1      | 0         |
| 0                                      | 0                                          | 0                                              | 0                                                           | 1      | 0         |
| 1                                      | 1                                          | 0                                              | 0                                                           | 0      | 0         |
| 1                                      | 1                                          | 1                                              | 1                                                           | 0      | 0         |
| 1                                      | 1                                          | 1                                              | 1                                                           | 1      | 0         |
| 1                                      | 1                                          | 0                                              | 0                                                           | 1      | 0         |
| 1                                      | 1                                          | 0                                              | 0                                                           | 0      | 0         |
| 0                                      | 0                                          | 0                                              | 0                                                           | 0      | 0         |
| 1                                      | 1                                          | 1                                              | 1                                                           | 1      | 0         |
| 1                                      | 1                                          | 0                                              | 0                                                           | 0      | 0         |
| 1                                      | 1                                          | 1                                              | 1                                                           | 0      | 0         |
| 0                                      | 0                                          | 0                                              | 0                                                           | 0      | 1         |
| 1                                      | 1                                          | 0                                              | 0                                                           | 1      | 0         |
| 1                                      | 1                                          | 0                                              | 0                                                           | 1      | 0         |
| 1                                      | 1                                          | 1                                              | 1                                                           | 0      | 1         |
| 1                                      | 1                                          | 0                                              | 0                                                           | 1      | 1         |
| 1                                      | 1                                          | 0                                              | 0                                                           | 1      | 1         |
| 0                                      | 0                                          | 0                                              | 0                                                           | 0      | 0         |
| 0                                      | 0                                          | 0                                              | 0                                                           | 0      | 0         |
| 1                                      | 1                                          | 0                                              | 0                                                           | 1      | 1         |
| 1                                      | 1                                          | 1                                              | 1                                                           | 1      | 0         |

| Shooting | Stabbing | Gnawing | Sharp | Tender | Burning | Exhausting |
|----------|----------|---------|-------|--------|---------|------------|
| 1        | 1        | 0       | 1     | 0      | 0       | 1          |
| 0        | 0        | 1       | 1     | 1      | 1       | 0          |
| 0        | 0        | 0       | 0     | 0      | 0       | 0          |
| 0        | 0        | 0       | 1     | 0      | 1       | 1          |
| 0        | 1        | 0       | 0     | 1      | 1       | 0          |
| 1        | 0        | 0       | 1     | 1      | 0       | 0          |
| 0        | 0        | 0       | 1     | 1      | 0       | 0          |
| 1        | 1        | 0       | 1     | 0      | 0       | 0          |
| 1        | 1        | 1       | 1     | 1      | 1       | 1          |
| 0        | 0        | 0       | 0     | 0      | 0       | 0          |
| 0        | 0        | 0       | 0     | 1      | 0       | 0          |
| 0        | 0        | 0       | 0     | 0      | 0       | 0          |
| 0        | 0        | 1       | 1     | 1      | 0       | 0          |
| 0        | 0        | 0       | 0     | 0      | 1       | 0          |
| 1        | 1        | 0       | 1     | 1      | 0       | 1          |
| 1        | 0        | 0       | 1     | 1      | 0       | 1          |
| 0        | 0        | 0       | 0     | 0      | 0       | 0          |
| 0        | 0        | 1       | 1     | 0      | 0       | 0          |
| 0        | 0        | 1       | 0     | 1      | 1       | 0          |
| 0        | 0        | 0       | 0     | 1      | 0       | 0          |
| 0        | 0        | 0       | 0     | 0      | 0       | 0          |
| 0        | 0        | 0       | 0     | 1      | 0       | 0          |
| 1        | 0        | 1       | 1     | 1      | 1       | 0          |
| 0        | 1        | 0       | 1     | 1      | 0       | 0          |
| 0        | 0        | 0       | 1     | 1      | 0       | 0          |
| 0        | 1        | 1       | 1     | 0      | 0       | 1          |
| 0        | 0        | 0       | 0     | 0      | 0       | 0          |
| 0        | 0        | 0       | 0     | 0      | 0       | 0          |
| 0        | 0        | 0       | 1     | 0      | 0       | 1          |
| 0        | 0        | 1       | 1     | 1      | 1       | 1          |

| Tiring | Penetrating | Nagging | Numb | Miserable | Unbearable |
|--------|-------------|---------|------|-----------|------------|
| 1      | 0           | 0       | 0    | 0         | 1          |
| 1      | 1           | 1       | 0    | 1         | 0          |
| 0      | 0           | 0       | 0    | 0         | 0          |
| 1      | 1           | 1       | 1    | 1         | 1          |
| 0      | 0           | 1       | 0    | 0         | 0          |
| 0      | 0           | 1       | 1    | 1         | 0          |
| 0      | 0           | 0       | 0    | 0         | 1          |
| 0      | 1           | 0       | 0    | 0         | 0          |
| 1      | 1           | 1       | 1    | 1         | 0          |
| 1      | 0           | 1       | 0    | 0         | 0          |
| 0      | 0           | 1       | 0    | 0         | 0          |
| 0      | 0           | 1       | 0    | 0         | 0          |
| 0      | 0           | 1       | 0    | 0         | 0          |
| 0      | 1           | 0       | 0    | 0         | 0          |
| 1      | 0           | 1       | 0    | 1         | 1          |
| 1      | 0           | 0       | 0    | 1         | 0          |
| 0      | 0           | 0       | 0    | 0         | 0          |
| 1      | 1           | 1       | 0    | 1         | 0          |
| 0      | 0           | 0       | 0    | 0         | 0          |
| 0      | 0           | 0       | 0    | 0         | 0          |
| 0      | 0           | 0       | 0    | 0         | 0          |
| 0      | 0           | 1       | 0    | 0         | 0          |
| 0      | 1           | 0       | 0    | 1         | 0          |
| 0      | 1           | 1       | 0    | 0         | 0          |
| 0      | 0           | 0       | 0    | 1         | 0          |
| 1      | 1           | 1       | 0    | 1         | 0          |
| 0      | 0           | 0       | 1    | 0         | 0          |
| 0      | 0           | 0       | 0    | 0         | 0          |
| 1      | 0           | 1       | 0    | 1         | 1          |
| 0      | 1           | 1       | 0    | 1         | 1          |



## Supplementary Table 2. Pearson r

|                                                                      | Age          | Gender       | UCSFOCPQ 1   |
|----------------------------------------------------------------------|--------------|--------------|--------------|
| Age                                                                  | 1            | -0.224459186 | -0.404331747 |
| Gender                                                               | -0.224459186 | 1            | 0.107183441  |
| UCSFOCPQ 1                                                           | -0.404331747 | 0.107183441  | 1            |
| UCSFOCPQ 2                                                           | -0.117589476 | 0.318690917  | 0.55084698   |
| UCSFOCPQ 3                                                           | -0.202510626 | -0.002883998 | 0.8205508    |
| UCSFOCPQ 4                                                           | -0.121410714 | 0.265674648  | 0.628229786  |
| UCSFOCPQ 5                                                           | -0.102047134 | 0.106933281  | 0.765229302  |
| UCSFOCPQ 6                                                           | -0.305934082 | 0.292907995  | 0.637299185  |
| UCSFOCPQ 7                                                           | 0.015875554  | 0.276652534  | 0.388474091  |
| UCSFOCPQ 8                                                           | 0.106814743  | 0.272303236  | 0.461550008  |
| <b>UCSFOCPQ average</b>                                              | -0.139611371 | 0.278632006  | 0.734618721  |
| Nodal Status                                                         | -0.330415901 | 0.219381727  | 0.340580364  |
| Tumor stage                                                          | -0.1303231   | 0.200594355  | 0.270029832  |
| Stage                                                                | -0.392281991 | 0.242857143  | 0.477458321  |
| PNI                                                                  | -0.196771704 | 0.025031309  | 0.451965457  |
| DOI                                                                  | -0.198189784 | -0.023566449 | 0.60970884   |
| <b>BPI Average Pain Intensity over 24 hours (0-10 scale)</b>         | -0.065662816 | 0.310847111  | 0.543755885  |
| BPI Worst Pain Intensity (0-10 scale)                                | 0.077038146  | 0.280214924  | 0.325623025  |
| BPI Number of Hours Pain Lasts on Days with Pain (0-24 hours)        | 0.099046609  | 0.002049385  | 0.34076869   |
| BPI Number of Days Pain Interferes with Mood and/or Activities (0-7) | -0.051769144 | 0.098491955  | 0.32057522   |
| BPI Relief from Pain Medication in Past Week (0-100%)                | -0.114611661 | 0.128797928  | -0.322584761 |
| BPI Overall Satisfaction with Pain Treatment (0-10)                  | 0.060145199  | 0.113877312  | -0.429644484 |
| General activity                                                     | -0.126193635 | 0.301290753  | 0.297480491  |
| Normal work                                                          | -0.054288965 | 0.168429695  | -0.017799569 |
| Walking ability                                                      | 0.129628965  | -0.068551062 | -0.020997783 |
| Sexual ability                                                       | -0.113479022 | 0.10672027   | 0.097334282  |
| Mood                                                                 | -0.345122995 | 0.212918602  | 0.360603204  |
| Relations w/ others                                                  | -0.092730537 | 0.049038244  | 0.323876269  |
| Enjoyment of life                                                    | -0.098184147 | 0.276486253  | 0.28630278   |
| Sleep                                                                | -0.205274884 | 0.298634979  | 0.462874142  |
| BPI Physical interferences average                                   | -0.064028272 | 0.173404301  | 0.138828656  |
| BPI Psychological interferences average                              | -0.225705423 | 0.256339996  | 0.411429059  |
| <b>BPI Average pain score</b>                                        | -0.15984966  | 0.258851555  | 0.357761141  |
| BPI Occurrence of Pain (0= No; 1= Yes)                               | -0.205726302 | 0.239045722  | 0.349654521  |
| BPI Pain Related to Cancer (0= No; 1= Yes)                           | -0.202576733 | 0.300668897  | 0.383567038  |
| BPI Pain NOT Related to Cancer (0= No; 1= Yes)                       | -0.052616552 | 0.098081648  | -0.027259783 |
| BPI Both Cancer and Non-Cancer Related Pain (0= No; 1= Yes)          | -0.064518056 | 0.170212899  | 0.021583479  |

| UCSFOCPQ 2   | UCSFOCPQ 3   | UCSFOCPQ 4   | UCSFOCPQ 5   | UCSFOCPQ 6   | UCSFOCPQ 7   | UCSFOCPQ 8   |
|--------------|--------------|--------------|--------------|--------------|--------------|--------------|
| -0.117589476 | -0.202510626 | -0.121410714 | -0.102047134 | -0.305934082 | 0.015875554  | 0.106814743  |
| 0.318690917  | -0.002883998 | 0.265674648  | 0.106933281  | 0.292907995  | 0.276652534  | 0.272303236  |
| 0.55084698   | 0.8205508    | 0.628229786  | 0.765229302  | 0.637299185  | 0.388474091  | 0.461550008  |
| 1            | 0.534903721  | 0.867340257  | 0.578317008  | 0.835209905  | 0.721153589  | 0.875537608  |
| 0.534903721  | 1            | 0.582663507  | 0.70145569   | 0.509024742  | 0.325023154  | 0.428465845  |
| 0.867340257  | 0.582663507  | 1            | 0.584809766  | 0.847806373  | 0.712844335  | 0.785144732  |
| 0.578317008  | 0.70145569   | 0.584809766  | 1            | 0.537602696  | 0.314740765  | 0.509934984  |
| 0.835209905  | 0.509024742  | 0.847806373  | 0.537602696  | 1            | 0.560618915  | 0.703683317  |
| 0.721153589  | 0.325023154  | 0.712844335  | 0.314740765  | 0.560618915  | 1            | 0.654103527  |
| 0.875537608  | 0.428465845  | 0.785144732  | 0.509934984  | 0.703683317  | 0.654103527  | 1            |
| 0.940269399  | 0.675473005  | 0.937545642  | 0.702479209  | 0.875354583  | 0.761858217  | 0.867624864  |
| 0.565365878  | 0.193550795  | 0.536616614  | 0.236307762  | 0.702000681  | 0.273432199  | 0.421299157  |
| 0.468958165  | 0.194444669  | 0.352811888  | 0.378519719  | 0.362796619  | 0.313238352  | 0.383374749  |
| 0.507845652  | 0.388088834  | 0.555165158  | 0.358209256  | 0.633559336  | 0.415474183  | 0.418589814  |
| 0.165322266  | 0.264256848  | 0.334751954  | 0.212861369  | 0.354378073  | 0.229371477  | 0.173434739  |
| 0.521364586  | 0.542727117  | 0.464341497  | 0.555335865  | 0.39657181   | 0.33153327   | 0.457592787  |
| 0.866843756  | 0.513926293  | 0.708225768  | 0.605302861  | 0.674910342  | 0.683559208  | 0.789784024  |
| 0.816522673  | 0.400287286  | 0.704579611  | 0.43317336   | 0.598710102  | 0.688484071  | 0.742209789  |
| 0.655214162  | 0.39492579   | 0.456117882  | 0.567904328  | 0.406831386  | 0.36587059   | 0.544385167  |
| 0.759166077  | 0.284257199  | 0.577131486  | 0.411049126  | 0.560637936  | 0.506857183  | 0.746030828  |
| -0.319359629 | -0.147986652 | -0.362551063 | -0.363774704 | -0.093520953 | -0.235155626 | -0.526726762 |
| -0.421884063 | -0.266348069 | -0.56304677  | -0.455881392 | -0.236991078 | -0.348658984 | -0.404608365 |
| 0.657743658  | 0.229988711  | 0.502777241  | 0.253360465  | 0.50466582   | 0.494840922  | 0.622415328  |
| 0.500532681  | -0.064659424 | 0.34247307   | -0.014952474 | 0.280077817  | 0.479678876  | 0.469955077  |
| 0.241405899  | -0.002012957 | 0.279707058  | 0.012256887  | 0.042226547  | 0.383621655  | 0.443232836  |
| 0.561236655  | 0.019930098  | 0.435846075  | 0.006976819  | 0.519647068  | 0.304099687  | 0.474546324  |
| 0.687471873  | 0.213713728  | 0.558454816  | 0.239704543  | 0.583450407  | 0.510398148  | 0.545491935  |
| 0.486424553  | 0.039104346  | 0.524374612  | 0.279907486  | 0.449435663  | 0.434409859  | 0.45515506   |
| 0.652998369  | 0.122365839  | 0.42308085   | 0.284114999  | 0.432302292  | 0.502994302  | 0.547960663  |
| 0.594262581  | 0.297121825  | 0.56471      | 0.43057308   | 0.641696185  | 0.46231667   | 0.542013762  |
| 0.63174308   | 0.075976302  | 0.500388763  | 0.097510911  | 0.443076962  | 0.527399045  | 0.641280383  |
| 0.701904283  | 0.196917414  | 0.598652453  | 0.354526872  | 0.614866426  | 0.552821673  | 0.604879304  |
| 0.754326657  | 0.199628514  | 0.624642512  | 0.323155675  | 0.604216043  | 0.607723112  | 0.692649191  |
| 0.634401604  | 0.357113045  | 0.507942638  | 0.374529039  | 0.457173093  | 0.468793583  | 0.578577749  |
| 0.696719618  | 0.395340547  | 0.565948945  | 0.415496457  | 0.50120503   | 0.518298127  | 0.638165252  |
| 0.120990232  | 0.078826714  | 0.201207777  | -0.162907917 | 0.143559951  | 0.253573701  | 0.231752376  |
| 0.213555231  | 0.132999583  | 0.283651156  | -0.110347811 | 0.211110723  | 0.327369445  | 0.320515797  |

| UCSFOCPQ<br>average | Nodal Status | Tumor stage  | Stage        | PNI          | DOI          | BPI Average<br>Pain Intensity<br>over 24 hours<br>(0-10 scale) |
|---------------------|--------------|--------------|--------------|--------------|--------------|----------------------------------------------------------------|
| -0.139611371        | -0.330415901 | -0.210469617 | -0.392281991 | -0.196771704 | -0.198189784 | -0.065662816                                                   |
| 0.278632006         | 0.219381727  | 0.209656967  | 0.242857143  | 0.025031309  | -0.023566449 | 0.310847111                                                    |
| 0.734618721         | 0.340580364  | 0.300790745  | 0.477458321  | 0.451965457  | 0.60970884   | 0.543755885                                                    |
| 0.940269399         | 0.565365878  | 0.450052646  | 0.507845652  | 0.165322266  | 0.521364586  | 0.866843756                                                    |
| 0.675473005         | 0.193550795  | 0.203367247  | 0.388088834  | 0.264256848  | 0.542727117  | 0.513926293                                                    |
| 0.937545642         | 0.536616614  | 0.356175306  | 0.555165158  | 0.334751954  | 0.464341497  | 0.708225768                                                    |
| 0.702479209         | 0.236307762  | 0.38441233   | 0.358209256  | 0.212861369  | 0.555335865  | 0.605302861                                                    |
| 0.875354583         | 0.702000681  | 0.391324374  | 0.633559336  | 0.354378073  | 0.39657181   | 0.674910342                                                    |
| 0.761858217         | 0.273432199  | 0.338619004  | 0.415474183  | 0.229371477  | 0.33153327   | 0.683559208                                                    |
| 0.867624864         | 0.421299157  | 0.350978243  | 0.418589814  | 0.173434739  | 0.457592787  | 0.789784024                                                    |
| 1                   | 0.535454125  | 0.422621703  | 0.58037563   | 0.31897621   | 0.553757531  | 0.837875216                                                    |
| 0.535454125         | 1            | 0.459446738  | 0.748855336  | 0.316133804  | 0.600238041  | 0.377271036                                                    |
| 0.427685688         | 0.39704478   | 1            | 0.54520517   | 0.173036183  | 0.582427363  | 0.352824752                                                    |
| 0.58037563          | 0.748855336  | 0.632455532  | 1            | 0.555695053  | 0.591345974  | 0.378035747                                                    |
| 0.31897621          | 0.316133804  | 0.216930458  | 0.555695053  | 1            | 0.318395865  | 0.171707198                                                    |
| 0.553757531         | 0.600238041  | 0.650654757  | 0.591345974  | 0.318395865  | 1            | 0.412237005                                                    |
| 0.837875216         | 0.377271036  | 0.343071311  | 0.378035747  | 0.171707198  | 0.412237005  | 1                                                              |
| 0.756840609         | 0.257192945  | 0.213497998  | 0.21330557   | 0.036523019  | 0.112879881  | 0.850127664                                                    |
| 0.570846679         | 0.393762804  | 0.226478281  | 0.305081286  | 0.035758166  | 0.481947742  | 0.711399361                                                    |
| 0.671158858         | 0.548083559  | 0.46934699   | 0.40917845   | 0.332732376  | 0.548329897  | 0.71069132                                                     |
| -0.378324731        | -0.02734405  | -0.2909805   | -0.02259967  | -0.238091165 | -0.294606133 | -0.525260116                                                   |
| -0.504463738        | -0.246493929 | -0.078086881 | -0.184510075 | -0.357082138 | -0.348720998 | -0.475317953                                                   |
| 0.579906811         | 0.442751007  | 0.399808138  | 0.4951888    | 0.218577902  | 0.451513528  | 0.651035154                                                    |
| 0.366083004         | 0.427476739  | 0.35018038   | 0.339050742  | 0.112660084  | 0.59362944   | 0.450957336                                                    |
| 0.25539797          | 0.11760095   | 0.271652684  | 0.21791981   | 0.033272127  | 0.573959755  | 0.195622685                                                    |
| 0.427409674         | 0.685627793  | 0.337025804  | 0.580989067  | 0.180438435  | 0.587942208  | 0.391862593                                                    |
| 0.599629142         | 0.602486941  | 0.523224864  | 0.5444337    | 0.227142493  | 0.666701142  | 0.559484817                                                    |
| 0.489722295         | 0.56655185   | 0.405510688  | 0.515912451  | 0.320306977  | 0.786117934  | 0.376961698                                                    |
| 0.529209325         | 0.428278106  | 0.534333922  | 0.319636016  | -0.02165842  | 0.623822455  | 0.590158431                                                    |
| 0.623843791         | 0.322522835  | 0.400320385  | 0.388629291  | 0.133357832  | 0.390682972  | 0.511324912                                                    |
| 0.527635737         | 0.537828351  | 0.410370144  | 0.524965997  | 0.184967173  | 0.661363076  | 0.546415444                                                    |
| 0.650203306         | 0.54247544   | 0.529102329  | 0.500325509  | 0.170426227  | 0.706608288  | 0.581863994                                                    |
| 0.680830871         | 0.567032604  | 0.505472032  | 0.534176921  | 0.194218717  | 0.704649808  | 0.674597299                                                    |
| 0.585413036         | 0.119416287  | 0.067419986  | 0.107089934  | -0.052981294 | 0.252260442  | 0.562781679                                                    |
| 0.6461285           | 0.184117064  | 0.188982237  | 0.1879753    | 0.012351328  | 0.336473134  | 0.64192034                                                     |
| 0.159243529         | -0.011562432 | -0.255654996 | 0            | -0.034199278 | -0.278259777 | 0.031661803                                                    |
| 0.247763248         | 0.053300179  | -0.150326797 | 0.076471911  | 0.01754386   | -0.191906359 | 0.132137874                                                    |

| BPI Worst Pain Intensity (0-10 scale) | BPI Number of Hours Pain Lasts on Days with Pain (0-24 hours) | BPI Number of Days Pain Interferes with Mood and/or Activities (0-7) | BPI Relief from Pain Medication in Past Week (0-100%) | BPI Overall Satisfaction with Pain Treatment (0-10) | General activity |
|---------------------------------------|---------------------------------------------------------------|----------------------------------------------------------------------|-------------------------------------------------------|-----------------------------------------------------|------------------|
| 0.077038146                           | 0.099046609                                                   | -0.051769144                                                         | -0.114611661                                          | 0.060145199                                         | -0.126193635     |
| 0.280214924                           | 0.002049385                                                   | 0.098491955                                                          | 0.128797928                                           | 0.113877312                                         | 0.301290753      |
| 0.325623025                           | 0.34076869                                                    | 0.32057522                                                           | -0.322584761                                          | -0.429644484                                        | 0.297480491      |
| 0.816522673                           | 0.655214162                                                   | 0.759166077                                                          | -0.319359629                                          | -0.421884063                                        | 0.657743658      |
| 0.400287286                           | 0.39492579                                                    | 0.284257199                                                          | -0.147986652                                          | -0.266348069                                        | 0.229988711      |
| 0.704579611                           | 0.456117882                                                   | 0.577131486                                                          | -0.362551063                                          | -0.56304677                                         | 0.502777241      |
| 0.43317336                            | 0.567904328                                                   | 0.411049126                                                          | -0.363774704                                          | -0.455881392                                        | 0.253360465      |
| 0.598710102                           | 0.406831386                                                   | 0.560637936                                                          | -0.093520953                                          | -0.236991078                                        | 0.50466582       |
| 0.688484071                           | 0.36587059                                                    | 0.506857183                                                          | -0.235155626                                          | -0.348658984                                        | 0.494840922      |
| 0.742209789                           | 0.544385167                                                   | 0.746030828                                                          | -0.526726762                                          | -0.404608365                                        | 0.622415328      |
| 0.756840609                           | 0.570846679                                                   | 0.671158858                                                          | -0.378324731                                          | -0.504463738                                        | 0.579906811      |
| 0.257192945                           | 0.393762804                                                   | 0.548083559                                                          | -0.02734405                                           | -0.246493929                                        | 0.442751007      |
| 0.249158266                           | 0.230273914                                                   | 0.494868599                                                          | -0.317454887                                          | -0.096286294                                        | 0.383130273      |
| 0.21330557                            | 0.305081286                                                   | 0.40917845                                                           | -0.02259967                                           | -0.184510075                                        | 0.4951888        |
| 0.036523019                           | 0.035758166                                                   | 0.332732376                                                          | -0.238091165                                          | -0.357082138                                        | 0.218577902      |
| 0.112879881                           | 0.481947742                                                   | 0.548329897                                                          | -0.294606133                                          | -0.348720998                                        | 0.451513528      |
| 0.850127664                           | 0.711399361                                                   | 0.71069132                                                           | -0.525260116                                          | -0.475317953                                        | 0.651035154      |
| 1                                     | 0.591402392                                                   | 0.600308211                                                          | -0.508701976                                          | -0.377730895                                        | 0.477419915      |
| 0.591402392                           | 1                                                             | 0.56794071                                                           | -0.375225823                                          | -0.522726631                                        | 0.32042491       |
| 0.600308211                           | 0.56794071                                                    | 1                                                                    | -0.538534014                                          | -0.461086764                                        | 0.624076107      |
| -0.508701976                          | -0.375225823                                                  | -0.538534014                                                         | 1                                                     | 0.806652963                                         | -0.126722491     |
| -0.377730895                          | -0.522726631                                                  | -0.461086764                                                         | 0.806652963                                           | 1                                                   | -0.126836136     |
| 0.477419915                           | 0.32042491                                                    | 0.624076107                                                          | -0.126722491                                          | -0.126836136                                        | 1                |
| 0.291239211                           | 0.412875036                                                   | 0.651848937                                                          | -0.138694379                                          | -0.231801719                                        | 0.615369069      |
| 0.157390122                           | 0.120172866                                                   | 0.378096775                                                          | -0.280401132                                          | -0.229403796                                        | 0.345973716      |
| 0.272641429                           | 0.453858856                                                   | 0.4449055                                                            | 0.21150261                                            | 0.090649483                                         | 0.585144575      |
| 0.413936188                           | 0.381286413                                                   | 0.632274757                                                          | -0.07821014                                           | -0.206111994                                        | 0.842587575      |
| 0.229833451                           | 0.435435404                                                   | 0.443140804                                                          | -0.134729411                                          | -0.31828467                                         | 0.548505251      |
| 0.495390477                           | 0.462448144                                                   | 0.581008781                                                          | -0.125991098                                          | -0.086435491                                        | 0.709815337      |
| 0.429366353                           | 0.278581431                                                   | 0.318354017                                                          | 0.030887361                                           | -0.105297326                                        | 0.559131355      |
| 0.395352258                           | 0.412197592                                                   | 0.663257637                                                          | -0.126627741                                          | -0.181315775                                        | 0.820369989      |
| 0.460844095                           | 0.440116593                                                   | 0.561110251                                                          | -0.080228464                                          | -0.20087364                                         | 0.756277705      |
| 0.521392675                           | 0.500852786                                                   | 0.670958851                                                          | -0.165562302                                          | -0.254398808                                        | 0.841353384      |
| 0.566124349                           | 0.342471226                                                   | 0.51796977                                                           | -0.221356802                                          | -0.238275487                                        | 0.431504577      |
| 0.671599471                           | 0.374888437                                                   | 0.552784726                                                          | -0.273680019                                          | -0.286573212                                        | 0.383980297      |
| 0.226973193                           | -0.02154133                                                   | 0.020953363                                                          | -0.021862428                                          | 0.02177423                                          | -0.103457811     |
| 0.354368238                           | 0.025321742                                                   | 0.080014214                                                          | -0.088805604                                          | -0.042528123                                        | -0.126276907     |

| Normal work  | Walking ability | Sexual ability | Mood         | Relations w/<br>others | Enjoyment of<br>life | Sleep        |
|--------------|-----------------|----------------|--------------|------------------------|----------------------|--------------|
| -0.054288965 | 0.129628965     | -0.113479022   | -0.345122995 | -0.092730537           | -0.098184147         | -0.205274884 |
| 0.168429695  | -0.068551062    | 0.10672027     | 0.212918602  | 0.049038244            | 0.276486253          | 0.298634979  |
| -0.017799569 | -0.020997783    | 0.097334282    | 0.360603204  | 0.323876269            | 0.28630278           | 0.462874142  |
| 0.500532681  | 0.241405899     | 0.561236655    | 0.687471873  | 0.486424553            | 0.652998369          | 0.594262581  |
| -0.064659424 | -0.002012957    | 0.019930098    | 0.213713728  | 0.039104346            | 0.122365839          | 0.297121825  |
| 0.34247307   | 0.279707058     | 0.435846075    | 0.558454816  | 0.524374612            | 0.42308085           | 0.56471      |
| -0.014952474 | 0.012256887     | 0.006976819    | 0.239704543  | 0.279907486            | 0.284114999          | 0.43057308   |
| 0.280077817  | 0.042226547     | 0.519647068    | 0.583450407  | 0.449435663            | 0.432302292          | 0.641696185  |
| 0.479678876  | 0.383621655     | 0.304099687    | 0.510398148  | 0.434409859            | 0.502994302          | 0.46231667   |
| 0.469955077  | 0.443232836     | 0.474546324    | 0.545491935  | 0.45515506             | 0.547960663          | 0.542013762  |
| 0.366083004  | 0.25539797      | 0.427409674    | 0.599629142  | 0.489722295            | 0.529209325          | 0.623843791  |
| 0.427476739  | 0.11760095      | 0.685627793    | 0.602486941  | 0.56655185             | 0.428278106          | 0.322522835  |
| 0.314035527  | 0.238310342     | 0.281013476    | 0.487429586  | 0.352778193            | 0.507381099          | 0.371410381  |
| 0.339050742  | 0.21791981      | 0.580989067    | 0.5444337    | 0.515912451            | 0.319636016          | 0.388629291  |
| 0.112660084  | 0.033272127     | 0.180438435    | 0.227142493  | 0.320306977            | -0.02165842          | 0.133357832  |
| 0.59362944   | 0.573959755     | 0.587942208    | 0.666701142  | 0.786117934            | 0.623822455          | 0.390682972  |
| 0.450957336  | 0.195622685     | 0.391862593    | 0.559484817  | 0.376961698            | 0.590158431          | 0.511324912  |
| 0.291239211  | 0.157390122     | 0.272641429    | 0.413936188  | 0.229833451            | 0.495390477          | 0.429366353  |
| 0.412875036  | 0.120172866     | 0.453858856    | 0.381286413  | 0.435435404            | 0.462448144          | 0.278581431  |
| 0.651848937  | 0.378096775     | 0.4449055      | 0.632274757  | 0.443140804            | 0.581008781          | 0.318354017  |
| -0.138694379 | -0.280401132    | 0.21150261     | -0.07821014  | -0.134729411           | -0.125991098         | 0.030887361  |
| -0.231801719 | -0.229403796    | 0.090649483    | -0.206111994 | -0.31828467            | -0.086435491         | -0.105297326 |
| 0.615369069  | 0.345973716     | 0.585144575    | 0.842587575  | 0.548505251            | 0.709815337          | 0.559131355  |
| 1            | 0.698874677     | 0.583200059    | 0.698896907  | 0.56881209             | 0.597266608          | 0.315137439  |
| 0.698874677  | 1               | 0.278725513    | 0.381515554  | 0.426506009            | 0.334429073          | 0.276488979  |
| 0.583200059  | 0.278725513     | 1              | 0.711966065  | 0.8287275              | 0.708547599          | 0.482476359  |
| 0.698896907  | 0.381515554     | 0.711966065    | 1            | 0.756862984            | 0.801944842          | 0.663480009  |
| 0.56881209   | 0.426506009     | 0.8287275      | 0.756862984  | 1                      | 0.684706401          | 0.530649032  |
| 0.597266608  | 0.334429073     | 0.708547599    | 0.801944842  | 0.684706401            | 1                    | 0.646656135  |
| 0.315137439  | 0.276488979     | 0.482476359    | 0.663480009  | 0.530649032            | 0.646656135          | 1            |
| 0.894128388  | 0.690832315     | 0.780282023    | 0.830872253  | 0.714985804            | 0.719268546          | 0.501771402  |
| 0.620504275  | 0.405944402     | 0.784407471    | 0.923454567  | 0.83328136             | 0.903444487          | 0.829796381  |
| 0.765362432  | 0.529721361     | 0.788207381    | 0.929152567  | 0.817246772            | 0.875233993          | 0.738374599  |
| 0.381308594  | 0.229415734     | 0.340510172    | 0.498381467  | 0.328226709            | 0.459347298          | 0.329221957  |
| 0.333638584  | 0.256494588     | 0.327916995    | 0.44208192   | 0.280960347            | 0.467136943          | 0.372463258  |
| -0.024014851 | 0.168414255     | 0.107287718    | -0.076154327 | -0.058178835           | -0.07638323          | -0.033126475 |
| -0.047144643 | 0.206986559     | 0.120434347    | -0.099952773 | -0.08349173            | -0.043619669         | 0.020966344  |

| BPI                                |                                     |                        |
|------------------------------------|-------------------------------------|------------------------|
| BPI Physical interferences average | Psychological interferences average | BPI Average pain score |
| -0.064028272                       | -0.225705423                        | -0.15984966            |
| 0.173404301                        | 0.256339996                         | 0.258851555            |
| 0.138828656                        | 0.411429059                         | 0.357761141            |
| 0.63174308                         | 0.701904283                         | 0.754326657            |
| 0.075976302                        | 0.196917414                         | 0.199628514            |
| 0.500388763                        | 0.598652453                         | 0.624642512            |
| 0.097510911                        | 0.354526872                         | 0.323155675            |
| 0.443076962                        | 0.614866426                         | 0.604216043            |
| 0.527399045                        | 0.552821673                         | 0.607723112            |
| 0.641280383                        | 0.604879304                         | 0.692649191            |
| 0.527635737                        | 0.650203306                         | 0.680830871            |
| 0.537828351                        | 0.54247544                          | 0.567032604            |
| 0.374745225                        | 0.492625837                         | 0.472399606            |
| 0.524965997                        | 0.500325509                         | 0.534176921            |
| 0.184967173                        | 0.170426227                         | 0.194218717            |
| 0.661363076                        | 0.706608288                         | 0.704649808            |
| 0.546415444                        | 0.581863994                         | 0.674597299            |
| 0.395352258                        | 0.460844095                         | 0.521392675            |
| 0.412197592                        | 0.440116593                         | 0.500852786            |
| 0.663257637                        | 0.561110251                         | 0.670958851            |
| -0.126627741                       | -0.080228464                        | -0.165562302           |
| -0.181315775                       | -0.20087364                         | -0.254398808           |
| 0.820369989                        | 0.756277705                         | 0.841353384            |
| 0.894128388                        | 0.620504275                         | 0.765362432            |
| 0.690832315                        | 0.405944402                         | 0.529721361            |
| 0.780282023                        | 0.784407471                         | 0.788207381            |
| 0.830872253                        | 0.923454567                         | 0.929152567            |
| 0.714985804                        | 0.83328136                          | 0.817246772            |
| 0.719268546                        | 0.903444487                         | 0.875233993            |
| 0.501771402                        | 0.829796381                         | 0.738374599            |
| 1                                  | 0.786590844                         | 0.914514991            |
| 0.786590844                        | 1                                   | 0.961024745            |
| 0.914514991                        | 0.961024745                         | 1                      |
| 0.438071258                        | 0.466803668                         | 0.509592922            |
| 0.410679952                        | 0.454900649                         | 0.501244976            |
| 0.039589574                        | -0.057669524                        | -0.022117361           |
| 0.038407899                        | -0.043950082                        | -0.002590375           |

## Supplementary Table 2. p value

|                                                                      | Age         | Gender      | UCSFOCPQ 1  |
|----------------------------------------------------------------------|-------------|-------------|-------------|
| Age                                                                  |             | 0.23307948  | 0.02668376  |
| Gender                                                               | 0.23307948  |             | 0.572923854 |
| UCSFOCPQ 1                                                           | 0.02668376  | 0.572923854 |             |
| UCSFOCPQ 2                                                           | 0.536015322 | 0.086079448 | 0.001607783 |
| UCSFOCPQ 3                                                           | 0.283166089 | 0.987932381 | 2.82892E-08 |
| UCSFOCPQ 4                                                           | 0.522752481 | 0.155905818 | 0.000201467 |
| UCSFOCPQ 5                                                           | 0.591551305 | 0.573824964 | 8.41757E-07 |
| UCSFOCPQ 6                                                           | 0.100142822 | 0.116222101 | 0.000152209 |
| UCSFOCPQ 7                                                           | 0.93364143  | 0.138883217 | 0.033881912 |
| UCSFOCPQ 8                                                           | 0.574252172 | 0.14545751  | 0.0102469   |
| <b>UCSFOCPQ average</b>                                              | 0.461848993 | 0.135963812 | 3.8005E-06  |
| Nodal Status                                                         | 0.085925471 | 0.262004961 | 0.076150833 |
| Tumor stage                                                          | 0.500423674 | 0.296777198 | 0.156580571 |
| Stage                                                                | 0.035310346 | 0.204296893 | 0.008813292 |
| PNI                                                                  | 0.306268473 | 0.897446064 | 0.013839768 |
| DOI                                                                  | 0.376616763 | 0.917091406 | 0.002590266 |
| <b>BPI Average Pain 24 hours Intensity (0-10 scale)</b>              | 0.730289591 | 0.094535073 | 0.001897959 |
| BPI Worst Pain Intensity (0-10 scale)                                | 0.685750955 | 0.133661683 | 0.079098564 |
| BPI Number of Hours Pain Lasts on Days with Pain (0-24 hours)        | 0.609224867 | 0.99158183  | 0.070458123 |
| BPI Number of Days Pain Interferes with Mood and/or Activities (0-7) | 0.785864371 | 0.60459645  | 0.084137    |
| BPI Relief from Pain Medication in Past Week (0-100%)                | 0.620817971 | 0.577929871 | 0.153807575 |
| BPI Overall Satisfaction with Pain Treatment (0-10)                  | 0.785155169 | 0.604898898 | 0.040749513 |
| General activity                                                     | 0.506379598 | 0.10566972  | 0.110373312 |
| Normal work                                                          | 0.775699303 | 0.373622747 | 0.925620067 |
| Walking ability                                                      | 0.494779272 | 0.718892592 | 0.91230265  |
| Sexual ability                                                       | 0.580974273 | 0.603836182 | 0.636194467 |
| Mood                                                                 | 0.061783075 | 0.258618406 | 0.050275604 |
| Relations w/ others                                                  | 0.625991368 | 0.796919989 | 0.080815126 |
| Enjoyment of life                                                    | 0.61236024  | 0.146527028 | 0.132146556 |
| Sleep                                                                | 0.276505802 | 0.108931951 | 0.010003311 |
| BPI Physical interferences average                                   | 0.7367647   | 0.359464446 | 0.46438846  |
| BPI Psychological interferences average                              | 0.230426621 | 0.171516584 | 0.023894291 |
| <b>BPI Average pain score</b>                                        | 0.398795101 | 0.167211839 | 0.052250056 |
| BPI Occurrence of Pain (0= No; 1= Yes)                               | 0.275427812 | 0.203297555 | 0.058219967 |
| BPI Pain Related to Cancer (0= No; 1= Yes)                           | 0.283005621 | 0.106426929 | 0.036402554 |
| BPI Pain NOT Related to Cancer (0= No; 1= Yes)                       | 0.786335101 | 0.612733309 | 0.888370057 |
| BPI Both Cancer and Non-Cancer Related Pain (0= No; 1= Yes)          | 0.739508657 | 0.3773597   | 0.911512764 |

| UCSFOCPQ 2  | UCSFOCPQ 3  | UCSFOCPQ 4  | UCSFOCPQ 5  | UCSFOCPQ 6  | UCSFOCPQ 7  | UCSFOCPQ 8  |
|-------------|-------------|-------------|-------------|-------------|-------------|-------------|
| 0.536015322 | 0.283166089 | 0.522752481 | 0.591551305 | 0.100142822 | 0.93364143  | 0.574252172 |
| 0.086079448 | 0.987932381 | 0.155905818 | 0.573824964 | 0.116222101 | 0.138883217 | 0.14545751  |
| 0.001607783 | 2.82892E-08 | 0.000201467 | 8.41757E-07 | 0.000152209 | 0.033881912 | 0.0102469   |
|             | 0.002323101 | 5.58624E-10 | 0.000815706 | 9.44596E-09 | 6.9267E-06  | 2.41099E-10 |
| 0.002323101 |             | 0.000728635 | 1.57106E-05 | 0.004070048 | 0.079684876 | 0.018161971 |
| 5.58624E-10 | 0.000728635 |             | 0.00068873  | 3.36842E-09 | 9.86494E-06 | 2.78226E-07 |
| 0.000815706 | 1.57106E-05 | 0.00068873  |             | 0.002185523 | 0.090262412 | 0.003993471 |
| 9.44596E-09 | 0.004070048 | 3.36842E-09 | 0.002185523 |             | 0.001271439 | 1.4368E-05  |
| 6.9267E-06  | 0.079684876 | 9.86494E-06 | 0.090262412 | 0.001271439 |             | 8.83675E-05 |
| 2.41099E-10 | 0.018161971 | 2.78226E-07 | 0.003993471 | 1.4368E-05  | 8.83675E-05 |             |
| 1.24789E-14 | 4.21138E-05 | 2.29047E-14 | 1.50803E-05 | 2.45821E-10 | 1.00454E-06 | 5.43073E-10 |
| 0.001717917 | 0.32371454  | 0.003240767 | 0.226029119 | 3.13637E-05 | 0.159161112 | 0.025565011 |
| 0.010282403 | 0.312138106 | 0.060483168 | 0.042890661 | 0.053080841 | 0.098009686 | 0.040081096 |
| 0.004917446 | 0.037495861 | 0.001772044 | 0.056387709 | 0.000224742 | 0.0250003   | 0.023825476 |
| 0.391419399 | 0.16597941  | 0.075895853 | 0.267587027 | 0.05927155  | 0.231342254 | 0.368260206 |
| 0.012834539 | 0.009058314 | 0.029475316 | 0.007296353 | 0.067659286 | 0.131743295 | 0.032246166 |
| 5.86738E-10 | 0.003672099 | 1.19451E-05 | 0.000394169 | 4.29765E-05 | 3.13149E-05 | 2.11421E-07 |
| 3.75894E-08 | 0.028388661 | 1.38576E-05 | 0.016796307 | 0.000473627 | 2.60256E-05 | 2.6666E-06  |
| 0.000114597 | 0.033985886 | 0.012887725 | 0.00131141  | 0.028508738 | 0.050951787 | 0.002265356 |
| 1.15451E-06 | 0.127912286 | 0.000840982 | 0.0240373   | 0.00127085  | 0.004257485 | 2.22071E-06 |
| 0.158200923 | 0.522059382 | 0.106269434 | 0.10500715  | 0.686793725 | 0.304838308 | 0.01415852  |
| 0.044943693 | 0.219271575 | 0.005153277 | 0.028797228 | 0.276245959 | 0.102996693 | 0.055488214 |
|             |             |             |             |             |             |             |
| 7.82054E-05 | 0.221463872 | 0.004630403 | 0.176724384 | 0.004454448 | 0.005436299 | 0.00024004  |
| 0.004847223 | 0.734262325 | 0.06394437  | 0.937492129 | 0.13385995  | 0.007311341 | 0.008781812 |
| 0.198737218 | 0.991576954 | 0.134397173 | 0.948744582 | 0.824660097 | 0.03637369  | 0.014161863 |
| 0.002854202 | 0.923016031 | 0.026033361 | 0.973016205 | 0.00651312  | 0.130946101 | 0.014306523 |
| 2.70421E-05 | 0.256802292 | 0.001340102 | 0.202017399 | 0.000713775 | 0.003954983 | 0.001823016 |
| 0.006418677 | 0.837446685 | 0.002933905 | 0.134106562 | 0.012716235 | 0.016452075 | 0.011494687 |
| 0.000123069 | 0.527153136 | 0.022211807 | 0.135258407 | 0.019178597 | 0.005416607 | 0.002090022 |
| 0.000534896 | 0.110823987 | 0.001149976 | 0.017539716 | 0.000132435 | 0.010105264 | 0.001975836 |
| 0.000180921 | 0.689867743 | 0.004861416 | 0.60821758  | 0.014199884 | 0.002745717 | 0.000134202 |
| 1.54315E-05 | 0.296954103 | 0.00047438  | 0.054570983 | 0.000299803 | 0.001534186 | 0.000398895 |
| 1.47604E-06 | 0.290218796 | 0.000224554 | 0.081531535 | 0.000406397 | 0.000368098 | 2.2194E-05  |
| 0.000166633 | 0.052708769 | 0.004162718 | 0.041439143 | 0.011087869 | 0.008973076 | 0.000810237 |
| 1.89469E-05 | 0.030593365 | 0.00111525  | 0.022406522 | 0.004781383 | 0.00334582  | 0.000148119 |
| 0.531842564 | 0.684407611 | 0.295271603 | 0.398469262 | 0.457512498 | 0.184414341 | 0.226401336 |
| 0.265993666 | 0.491588106 | 0.135924968 | 0.568781465 | 0.271634596 | 0.083002479 | 0.090044911 |



| UCSF OCPQ<br>average | Nodal Status | Tumor stage | Stage       | PNI         | DOI         | BPI Average<br>Pain Intensity<br>over 24 hours<br>(0-10 scale) |
|----------------------|--------------|-------------|-------------|-------------|-------------|----------------------------------------------------------------|
| 0.461848993          | 0.085925471  | 0.292000175 | 0.035310346 | 0.306268473 | 0.376616763 | 0.730289591                                                    |
| 0.135963812          | 0.262004961  | 0.293910363 | 0.204296893 | 0.897446064 | 0.917091406 | 0.094535073                                                    |
| 3.8005E-06           | 0.076150833  | 0.127370524 | 0.008813292 | 0.013839768 | 0.002590266 | 0.001897959                                                    |
| 1.24789E-14          | 0.001717917  | 0.018497169 | 0.004917446 | 0.391419399 | 0.012834539 | 5.86738E-10                                                    |
| 4.21138E-05          | 0.32371454   | 0.308960012 | 0.037495861 | 0.16597941  | 0.009058314 | 0.003672099                                                    |
| 2.29047E-14          | 0.003240767  | 0.068228381 | 0.001772044 | 0.075895853 | 0.029475316 | 1.19451E-05                                                    |
| 1.50803E-05          | 0.226029119  | 0.047729581 | 0.056387709 | 0.267587027 | 0.007296353 | 0.000394169                                                    |
| 2.45821E-10          | 3.13637E-05  | 0.04354204  | 0.000224742 | 0.05927155  | 0.067659286 | 4.29765E-05                                                    |
| 1.00454E-06          | 0.159161112  | 0.084038623 | 0.0250003   | 0.231342254 | 0.131743295 | 3.13149E-05                                                    |
| 5.43073E-10          | 0.025565011  | 0.072647648 | 0.023825476 | 0.368260206 | 0.032246166 | 2.11421E-07                                                    |
|                      | 0.003321172  | 0.028080156 | 0.000965094 | 0.091687489 | 0.007500005 | 7.65009E-09                                                    |
| 0.003321172          |              | 0.018212859 | 4.56295E-06 | 0.101234489 | 0.004017552 | 0.047800112                                                    |
| 0.0206514            | 0.036434073  |             | 0.002224062 | 0.369378815 | 0.004452624 | 0.060473138                                                    |
| 0.000965094          | 4.56295E-06  | 0.000400757 |             | 0.001750408 | 0.003749301 | 0.043179122                                                    |
| 0.091687489          | 0.101234489  | 0.277092736 | 0.001750408 |             | 0.148701177 | 0.373123192                                                    |
| 0.007500005          | 0.004017552  | 0.00189287  | 0.003749301 | 0.148701177 |             | 0.056588954                                                    |
| 7.65009E-09          | 0.047800112  | 0.079788713 | 0.043179122 | 0.373123192 | 0.056588954 |                                                                |
| 1.30009E-06          | 0.186419809  | 0.28495087  | 0.266566268 | 0.850803423 | 0.616968152 | 2.75757E-09                                                    |
| 0.001221217          | 0.042136277  | 0.265899414 | 0.114418956 | 0.856646087 | 0.023127906 | 1.51622E-05                                                    |
| 4.91448E-05          | 0.002532893  | 0.013517037 | 0.027518668 | 0.077791659 | 0.008236507 | 1.07901E-05                                                    |
| 0.090824247          | 0.906341226  | 0.226810296 | 0.922539734 | 0.298663959 | 0.306560077 | 0.014479368                                                    |
| 0.014098429          | 0.25686855   | 0.736537811 | 0.399338079 | 0.094391788 | 0.185586482 | 0.021894917                                                    |
| 0.000782855          | 0.018302825  | 0.038806167 | 0.006310071 | 0.2546437   | 0.034914656 | 9.78308E-05                                                    |
| 0.046635715          | 0.023267563  | 0.073345122 | 0.071979023 | 0.560658392 | 0.003585017 | 0.012381102                                                    |
| 0.173151232          | 0.551182931  | 0.170470315 | 0.256112441 | 0.863955195 | 0.005219097 | 0.300205225                                                    |
| 0.029413208          | 0.000217474  | 0.115812475 | 0.002323028 | 0.388071676 | 0.006403279 | 0.047721569                                                    |
| 0.000461767          | 0.000692076  | 0.005101903 | 0.002262894 | 0.236032911 | 0.000702911 | 0.001307029                                                    |
| 0.006017146          | 0.001671458  | 0.035860451 | 0.004174179 | 0.090266382 | 1.44493E-05 | 0.0400317                                                      |
| 0.003158282          | 0.02583169   | 0.004924519 | 0.097304198 | 0.912890758 | 0.001919465 | 0.000752195                                                    |
| 0.000230003          | 0.094151718  | 0.038533926 | 0.037208226 | 0.490411487 | 0.072220289 | 0.003878924                                                    |
| 0.002731439          | 0.003158737  | 0.033493905 | 0.003456446 | 0.336759796 | 0.000803313 | 0.001784206                                                    |
| 0.000100547          | 0.002860422  | 0.004543384 | 0.005709132 | 0.376753187 | 0.0002369   | 0.00074401                                                     |
| 3.46426E-05          | 0.001652937  | 0.007154649 | 0.002837543 | 0.312711738 | 0.000250896 | 4.34633E-05                                                    |
| 0.000677865          | 0.545009921  | 0.738282892 | 0.580315592 | 0.784888219 | 0.257391853 | 0.001205903                                                    |
| 0.000114848          | 0.348301198  | 0.345139411 | 0.328820652 | 0.949296345 | 0.125739667 | 0.000131492                                                    |
| 0.409305838          | 0.954354817  | 0.207470252 | 1           | 0.862836013 | 0.209873467 | 0.870483318                                                    |
| 0.195019643          | 0.791750491  | 0.463557162 | 0.698926803 | 0.92939385  | 0.392234497 | 0.494424114                                                    |

| BPI Worst Pain Intensity (0-10 scale) | BPI Number of Hours Pain Lasts on Days with Pain (0-24 hours) | BPI Number of Days Pain Interferes with Mood and/or Activities (0-7) | BPI Relief from Pain Medication in Past Week (0-100%) | BPI Overall Satisfaction with Pain Treatment (0-10) | General activity |
|---------------------------------------|---------------------------------------------------------------|----------------------------------------------------------------------|-------------------------------------------------------|-----------------------------------------------------|------------------|
| 0.685750955                           | 0.609224867                                                   | 0.785864371                                                          | 0.620817971                                           | 0.785155169                                         | 0.506379598      |
| 0.133661683                           | 0.99158183                                                    | 0.60459645                                                           | 0.577929871                                           | 0.604898898                                         | 0.10566972       |
| 0.079098564                           | 0.070458123                                                   | 0.084137                                                             | 0.153807575                                           | 0.040749513                                         | 0.110373312      |
| 3.75894E-08                           | 0.000114597                                                   | 1.15451E-06                                                          | 0.158200923                                           | 0.044943693                                         | 7.82054E-05      |
| 0.028388661                           | 0.033985886                                                   | 0.127912286                                                          | 0.522059382                                           | 0.219271575                                         | 0.221463872      |
| 1.38576E-05                           | 0.012887725                                                   | 0.000840982                                                          | 0.106269434                                           | 0.005153277                                         | 0.004630403      |
| 0.016796307                           | 0.00131141                                                    | 0.0240373                                                            | 0.10500715                                            | 0.028797228                                         | 0.176724384      |
| 0.000473627                           | 0.028508738                                                   | 0.00127085                                                           | 0.686793725                                           | 0.276245959                                         | 0.004454448      |
| 2.60256E-05                           | 0.050951787                                                   | 0.004257485                                                          | 0.304838308                                           | 0.102996693                                         | 0.005436299      |
| 2.6666E-06                            | 0.002265356                                                   | 2.22071E-06                                                          | 0.01415852                                            | 0.055488214                                         | 0.00024004       |
| 1.30009E-06                           | 0.001221217                                                   | 4.91448E-05                                                          | 0.090824247                                           | 0.014098429                                         | 0.000782855      |
| 0.186419809                           | 0.042136277                                                   | 0.002532893                                                          | 0.906341226                                           | 0.25686855                                          | 0.018302825      |
| 0.192435813                           | 0.238451493                                                   | 0.006349243                                                          | 0.160836198                                           | 0.66208284                                          | 0.040218959      |
| 0.266566268                           | 0.114418956                                                   | 0.027518668                                                          | 0.922539734                                           | 0.399338079                                         | 0.006310071      |
| 0.850803423                           | 0.856646087                                                   | 0.077791659                                                          | 0.298663959                                           | 0.094391788                                         | 0.2546437        |
| 0.616968152                           | 0.023127906                                                   | 0.008236507                                                          | 0.306560077                                           | 0.185586482                                         | 0.034914656      |
| 2.75757E-09                           | 1.51622E-05                                                   | 1.07901E-05                                                          | 0.014479368                                           | 0.021894917                                         | 9.78308E-05      |
|                                       | 0.000728317                                                   | 0.000453172                                                          | 0.018526597                                           | 0.075565369                                         | 0.007632861      |
| 0.000728317                           |                                                               | 0.001310261                                                          | 0.10305529                                            | 0.012560665                                         | 0.090141254      |
| 0.000453172                           | 0.001310261                                                   |                                                                      | 0.011779589                                           | 0.026798529                                         | 0.000228406      |
| 0.018526597                           | 0.10305529                                                    | 0.011779589                                                          |                                                       | 1.00036E-05                                         | 0.584123729      |
| 0.075565369                           | 0.012560665                                                   | 0.026798529                                                          | 1.00036E-05                                           |                                                     | 0.564142029      |
| 0.007632861                           | 0.090141254                                                   | 0.000228406                                                          | 0.584123729                                           | 0.564142029                                         |                  |
| 0.118413009                           | 0.026016167                                                   | 9.52369E-05                                                          | 0.548793813                                           | 0.287207003                                         | 0.00029545       |
| 0.406184797                           | 0.534638365                                                   | 0.039388232                                                          | 0.218262536                                           | 0.292362462                                         | 0.061101475      |
| 0.177811096                           | 0.022674585                                                   | 0.022760907                                                          | 0.415126862                                           | 0.71207694                                          | 0.001689535      |
| 0.022967974                           | 0.041270992                                                   | 0.00017798                                                           | 0.736136195                                           | 0.345405061                                         | 5.22001E-09      |
| 0.221784566                           | 0.018229234                                                   | 0.014184302                                                          | 0.560386753                                           | 0.138840321                                         | 0.00169902       |
| 0.006285504                           | 0.013220583                                                   | 0.000949876                                                          | 0.596606924                                           | 0.702112468                                         | 1.6154E-05       |
| 0.017893858                           | 0.143366944                                                   | 0.086430322                                                          | 0.894266429                                           | 0.632536448                                         | 0.001318298      |
| 0.030587986                           | 0.026286397                                                   | 6.47911E-05                                                          | 0.584407174                                           | 0.407691346                                         | 2.86568E-08      |
| 0.010378786                           | 0.016883312                                                   | 0.001256284                                                          | 0.729569375                                           | 0.358069593                                         | 1.33775E-06      |
| 0.003130227                           | 0.005650296                                                   | 4.94948E-05                                                          | 0.473240071                                           | 0.24143294                                          | 5.77647E-09      |
| 0.001110408                           | 0.068975508                                                   | 0.003369428                                                          | 0.334893138                                           | 0.273574393                                         | 0.017270334      |
| 4.83814E-05                           | 0.045092914                                                   | 0.001535536                                                          | 0.229964487                                           | 0.184931907                                         | 0.036184615      |
| 0.236391757                           | 0.913359939                                                   | 0.914086511                                                          | 0.927105863                                           | 0.923377913                                         | 0.593295093      |
| 0.059279099                           | 0.898227018                                                   | 0.679900644                                                          | 0.709658021                                           | 0.850943046                                         | 0.513930053      |

| Normal work | Walking ability | Sexual ability | Mood        | Relations w/<br>others | Enjoyment of<br>life | Sleep       |
|-------------|-----------------|----------------|-------------|------------------------|----------------------|-------------|
| 0.775699303 | 0.494779272     | 0.580974273    | 0.061783075 | 0.625991368            | 0.61236024           | 0.276505802 |
| 0.373622747 | 0.718892592     | 0.603836182    | 0.258618406 | 0.796919989            | 0.146527028          | 0.108931951 |
| 0.925620067 | 0.91230265      | 0.636194467    | 0.050275604 | 0.080815126            | 0.132146556          | 0.010003311 |
| 0.004847223 | 0.198737218     | 0.002854202    | 2.70421E-05 | 0.006418677            | 0.000123069          | 0.000534896 |
| 0.734262325 | 0.991576954     | 0.923016031    | 0.256802292 | 0.837446685            | 0.527153136          | 0.110823987 |
| 0.06394437  | 0.134397173     | 0.026033361    | 0.001340102 | 0.002933905            | 0.022211807          | 0.001149976 |
| 0.937492129 | 0.948744582     | 0.973016205    | 0.202017399 | 0.134106562            | 0.135258407          | 0.017539716 |
| 0.13385995  | 0.824660097     | 0.00651312     | 0.000713775 | 0.012716235            | 0.019178597          | 0.000132435 |
| 0.007311341 | 0.03637369      | 0.130946101    | 0.003954983 | 0.016452075            | 0.005416607          | 0.010105264 |
| 0.008781812 | 0.014161863     | 0.014306523    | 0.001823016 | 0.011494687            | 0.002090022          | 0.001975836 |
| 0.046635715 | 0.173151232     | 0.029413208    | 0.000461767 | 0.006017146            | 0.003158282          | 0.000230003 |
| 0.023267563 | 0.551182931     | 0.000217474    | 0.000692076 | 0.001671458            | 0.02583169           | 0.094151718 |
| 0.097112214 | 0.213161027     | 0.173595867    | 0.007319129 | 0.060509446            | 0.005852697          | 0.04728561  |
| 0.071979023 | 0.256112441     | 0.002323028    | 0.002262894 | 0.004174179            | 0.097304198          | 0.037208226 |
| 0.560658392 | 0.863955195     | 0.388071676    | 0.236032911 | 0.090266382            | 0.912890758          | 0.490411487 |
| 0.003585017 | 0.005219097     | 0.006403279    | 0.000702911 | 1.44493E-05            | 0.001919465          | 0.072220289 |
| 0.012381102 | 0.300205225     | 0.047721569    | 0.001307029 | 0.0400317              | 0.000752195          | 0.003878924 |
| 0.118413009 | 0.406184797     | 0.177811096    | 0.022967974 | 0.221784566            | 0.006285504          | 0.017893858 |
| 0.026016167 | 0.534638365     | 0.022674585    | 0.041270992 | 0.018229234            | 0.013220583          | 0.143366944 |
| 9.52369E-05 | 0.039388232     | 0.022760907    | 0.00017798  | 0.014184302            | 0.000949876          | 0.086430322 |
| 0.548793813 | 0.218262536     | 0.415126862    | 0.736136195 | 0.560386753            | 0.596606924          | 0.894266429 |
| 0.287207003 | 0.292362462     | 0.71207694     | 0.345405061 | 0.138840321            | 0.702112468          | 0.632536448 |
| 0.00029545  | 0.061101475     | 0.001689535    | 5.22001E-09 | 0.00169902             | 1.6154E-05           | 0.001318298 |
|             | 1.74066E-05     | 0.001765783    | 1.73913E-05 | 0.00103848             | 0.00062446           | 0.089835509 |
| 1.74066E-05 |                 | 0.167945731    | 0.037500133 | 0.018756983            | 0.076196535          | 0.139126458 |
| 0.001765783 | 0.167945731     |                | 4.51936E-05 | 1.70454E-07            | 5.10463E-05          | 0.012549719 |
| 1.73913E-05 | 0.037500133     | 4.51936E-05    |             | 1.29861E-06            | 1.6953E-07           | 6.42962E-05 |
| 0.00103848  | 0.018756983     | 1.70454E-07    | 1.29861E-06 |                        | 4.18617E-05          | 0.002555192 |
| 0.00062446  | 0.076196535     | 5.10463E-05    | 1.6953E-07  | 4.18617E-05            |                      | 0.000150476 |
| 0.089835509 | 0.139126458     | 0.012549719    | 6.42962E-05 | 0.002555192            | 0.000150476          |             |
| 2.81946E-11 | 2.37982E-05     | 2.589E-06      | 1.32096E-08 | 9.01624E-06            | 1.09992E-05          | 0.004726516 |
| 0.000254075 | 0.026027696     | 2.11048E-06    | 3.61925E-13 | 1.09777E-08            | 1.95572E-11          | 1.43345E-08 |
| 8.35851E-07 | 0.002608374     | 1.74153E-06    | 1.27E-13    | 3.57352E-08            | 5.23835E-10          | 3.19414E-06 |
| 0.037612322 | 0.222648935     | 0.088723059    | 0.005063109 | 0.076592076            | 0.012185626          | 0.075650316 |
| 0.071578389 | 0.171249376     | 0.101964316    | 0.014444612 | 0.132587498            | 0.010622527          | 0.042665167 |
| 0.901590111 | 0.382495967     | 0.609734548    | 0.69458888  | 0.764348609            | 0.699259887          | 0.864545302 |
| 0.808122424 | 0.281325343     | 0.566349087    | 0.605937901 | 0.666764697            | 0.825563603          | 0.914033481 |

BPI

| BPI Physical interferences average | Psychological interferences average | BPI Average pain score |
|------------------------------------|-------------------------------------|------------------------|
| 0.7367647                          | 0.230426621                         | 0.398795101            |
| 0.359464446                        | 0.171516584                         | 0.167211839            |
| 0.46438846                         | 0.023894291                         | 0.052250056            |
| 0.000180921                        | 1.54315E-05                         | 1.47604E-06            |
| 0.689867743                        | 0.296954103                         | 0.290218796            |
| 0.004861416                        | 0.00047438                          | 0.000224554            |
| 0.60821758                         | 0.054570983                         | 0.081531535            |
| 0.014199884                        | 0.000299803                         | 0.000406397            |
| 0.002745717                        | 0.001534186                         | 0.000368098            |
| 0.000134202                        | 0.000398895                         | 2.2194E-05             |
| 0.002731439                        | 0.000100547                         | 3.46426E-05            |
| 0.003158737                        | 0.002860422                         | 0.001652937            |
| 0.045181575                        | 0.006629438                         | 0.009664609            |
| 0.003456446                        | 0.005709132                         | 0.002837543            |
| 0.336759796                        | 0.376753187                         | 0.312711738            |
| 0.000803313                        | 0.0002369                           | 0.000250896            |
| 0.001784206                        | 0.00074401                          | 4.34633E-05            |
| 0.030587986                        | 0.010378786                         | 0.003130227            |
| 0.026286397                        | 0.016883312                         | 0.005650296            |
| 6.47911E-05                        | 0.001256284                         | 4.94948E-05            |
| 0.584407174                        | 0.729569375                         | 0.473240071            |
| 0.407691346                        | 0.358069593                         | 0.24143294             |
| 2.86568E-08                        | 1.33775E-06                         | 5.77647E-09            |
| 2.81946E-11                        | 0.000254075                         | 8.35851E-07            |
| 2.37982E-05                        | 0.026027696                         | 0.002608374            |
| 2.589E-06                          | 2.11048E-06                         | 1.74153E-06            |
| 1.32096E-08                        | 3.61925E-13                         | 1.27E-13               |
| 9.01624E-06                        | 1.09777E-08                         | 3.57352E-08            |
| 1.09992E-05                        | 1.95572E-11                         | 5.23835E-10            |
| 0.004726516                        | 1.43345E-08                         | 3.19414E-06            |
|                                    | 2.55587E-07                         | 1.60614E-12            |
| 2.55587E-07                        |                                     | 3.60054E-17            |
| 1.60614E-12                        | 3.60054E-17                         |                        |
| 0.015466934                        | 0.009308924                         | 0.004022102            |
| 0.024176931                        | 0.011546851                         | 0.004777496            |
| 0.838433124                        | 0.766354647                         | 0.909332776            |
| 0.843195635                        | 0.82090842                          | 0.989359742            |

## Supplementary Table 2. Sample size

|                                                                | Age | Gender | UCSFOCPQ 1 |
|----------------------------------------------------------------|-----|--------|------------|
| Age                                                            | 30  | 30     | 30         |
| Gender                                                         | 30  | 30     | 30         |
| UCSFOCPQ 1                                                     | 30  | 30     | 30         |
| UCSFOCPQ 2                                                     | 30  | 30     | 30         |
| UCSFOCPQ 3                                                     | 30  | 30     | 30         |
| UCSFOCPQ 4                                                     | 30  | 30     | 30         |
| UCSFOCPQ 5                                                     | 30  | 30     | 30         |
| UCSFOCPQ 6                                                     | 30  | 30     | 30         |
| UCSFOCPQ 7                                                     | 30  | 30     | 30         |
| UCSFOCPQ 8                                                     | 30  | 30     | 30         |
| <b>UCSFOCPQ average</b>                                        | 30  | 30     | 30         |
| Nodal Status                                                   | 28  | 28     | 28         |
| Tumor stage                                                    | 29  | 29     | 29         |
| Stage                                                          | 29  | 29     | 29         |
| PNI                                                            | 29  | 29     | 29         |
| DOI                                                            | 22  | 22     | 22         |
| <b>BPI Average Pain Intensity over 24 hours(0-10 scale)</b>    | 30  | 30     | 30         |
| BPI Worst Pain Intensity (0-10 scale)                          | 30  | 30     | 30         |
| BPI Number of Hours Pain Lasts on Days with Pain (0-24 hours)  | 29  | 29     | 29         |
| BPI Number of Days Pain Interferes with Mood and/or Activities | 30  | 30     | 30         |
| BPI Relief from Pain Medication in Past Week (0-100%)          | 21  | 21     | 21         |
| BPI Overall Satisfaction with Pain Treatment (0-10)            | 23  | 23     | 23         |
| General activity                                               | 30  | 30     | 30         |
| Normal work                                                    | 30  | 30     | 30         |
| Walking ability                                                | 30  | 30     | 30         |
| Sexual ability                                                 | 26  | 26     | 26         |
| Mood                                                           | 30  | 30     | 30         |
| Relations w/ others                                            | 30  | 30     | 30         |
| Enjoyment of life                                              | 29  | 29     | 29         |
| Sleep                                                          | 30  | 30     | 30         |
| BPI Physical interferences average                             | 30  | 30     | 30         |
| BPI Psychological interferences average                        | 30  | 30     | 30         |
| <b>BPI Average pain score</b>                                  | 30  | 30     | 30         |
| BPI Occurrence of Pain (0= No; 1= Yes)                         | 30  | 30     | 30         |
| BPI Pain Related to Cancer (0= No; 1= Yes)                     | 30  | 30     | 30         |
| BPI Pain NOT Related to Cancer (0= No; 1= Yes)                 | 29  | 29     | 29         |
| BPI Both Cancer and Non-Cancer Related Pain (0= No; 1= Yes)    | 29  | 29     | 29         |

| UCSFOCPQ 2 | UCSFOCPQ 3 | UCSFOCPQ 4 | UCSFOCPQ 5 | UCSFOCPQ 6 | UCSFOCPQ 7 | UCSFOCPQ 8 |
|------------|------------|------------|------------|------------|------------|------------|
| 30         | 30         | 30         | 30         | 30         | 30         | 30         |
| 30         | 30         | 30         | 30         | 30         | 30         | 30         |
| 30         | 30         | 30         | 30         | 30         | 30         | 30         |
| 30         | 30         | 30         | 30         | 30         | 30         | 30         |
| 30         | 30         | 30         | 30         | 30         | 30         | 30         |
| 30         | 30         | 30         | 30         | 30         | 30         | 30         |
| 30         | 30         | 30         | 30         | 30         | 30         | 30         |
| 30         | 30         | 30         | 30         | 30         | 30         | 30         |
| 30         | 30         | 30         | 30         | 30         | 30         | 30         |
| 30         | 30         | 30         | 30         | 30         | 30         | 30         |
| 28         | 28         | 28         | 28         | 28         | 28         | 28         |
| 29         | 29         | 29         | 29         | 29         | 29         | 29         |
| 29         | 29         | 29         | 29         | 29         | 29         | 29         |
| 29         | 29         | 29         | 29         | 29         | 29         | 29         |
| 22         | 22         | 22         | 22         | 22         | 22         | 22         |
| 30         | 30         | 30         | 30         | 30         | 30         | 30         |
| 30         | 30         | 30         | 30         | 30         | 30         | 30         |
| 29         | 29         | 29         | 29         | 29         | 29         | 29         |
| 30         | 30         | 30         | 30         | 30         | 30         | 30         |
| 21         | 21         | 21         | 21         | 21         | 21         | 21         |
| 23         | 23         | 23         | 23         | 23         | 23         | 23         |
| 30         | 30         | 30         | 30         | 30         | 30         | 30         |
| 30         | 30         | 30         | 30         | 30         | 30         | 30         |
| 30         | 30         | 30         | 30         | 30         | 30         | 30         |
| 26         | 26         | 26         | 26         | 26         | 26         | 26         |
| 30         | 30         | 30         | 30         | 30         | 30         | 30         |
| 30         | 30         | 30         | 30         | 30         | 30         | 30         |
| 29         | 29         | 29         | 29         | 29         | 29         | 29         |
| 30         | 30         | 30         | 30         | 30         | 30         | 30         |
| 30         | 30         | 30         | 30         | 30         | 30         | 30         |
| 30         | 30         | 30         | 30         | 30         | 30         | 30         |
| 30         | 30         | 30         | 30         | 30         | 30         | 30         |
| 30         | 30         | 30         | 30         | 30         | 30         | 30         |
| 30         | 30         | 30         | 30         | 30         | 30         | 30         |
| 29         | 29         | 29         | 29         | 29         | 29         | 29         |
| 29         | 29         | 29         | 29         | 29         | 29         | 29         |

| UCSFOCPQ<br>average | Nodal Status | Tumor stage | Stage | PNI | DOI | BPI Average<br>Pain Intensity<br>over 24 hours<br>(0-10 scale) |
|---------------------|--------------|-------------|-------|-----|-----|----------------------------------------------------------------|
| 30                  | 28           | 27          | 29    | 29  | 22  | 30                                                             |
| 30                  | 28           | 27          | 29    | 29  | 22  | 30                                                             |
| 30                  | 28           | 27          | 29    | 29  | 22  | 30                                                             |
| 30                  | 28           | 27          | 29    | 29  | 22  | 30                                                             |
| 30                  | 28           | 27          | 29    | 29  | 22  | 30                                                             |
| 30                  | 28           | 27          | 29    | 29  | 22  | 30                                                             |
| 30                  | 28           | 27          | 29    | 29  | 22  | 30                                                             |
| 30                  | 28           | 27          | 29    | 29  | 22  | 30                                                             |
| 30                  | 28           | 27          | 29    | 29  | 22  | 30                                                             |
| 30                  | 28           | 27          | 29    | 29  | 22  | 30                                                             |
| 28                  | 28           | 26          | 28    | 28  | 21  | 28                                                             |
| 29                  | 28           | 27          | 29    | 29  | 22  | 29                                                             |
| 29                  | 28           | 27          | 29    | 29  | 22  | 29                                                             |
| 29                  | 28           | 27          | 29    | 29  | 22  | 29                                                             |
| 22                  | 21           | 20          | 22    | 22  | 22  | 22                                                             |
| 30                  | 28           | 27          | 29    | 29  | 22  | 30                                                             |
| 30                  | 28           | 27          | 29    | 29  | 22  | 30                                                             |
| 29                  | 27           | 26          | 28    | 28  | 22  | 29                                                             |
| 30                  | 28           | 27          | 29    | 29  | 22  | 30                                                             |
| 21                  | 21           | 19          | 21    | 21  | 14  | 21                                                             |
| 23                  | 23           | 21          | 23    | 23  | 16  | 23                                                             |
| 30                  | 28           | 27          | 29    | 29  | 22  | 30                                                             |
| 30                  | 28           | 27          | 29    | 29  | 22  | 30                                                             |
| 30                  | 28           | 27          | 29    | 29  | 22  | 30                                                             |
| 26                  | 24           | 23          | 25    | 25  | 20  | 26                                                             |
| 30                  | 28           | 27          | 29    | 29  | 22  | 30                                                             |
| 30                  | 28           | 27          | 29    | 29  | 22  | 30                                                             |
| 29                  | 27           | 26          | 28    | 28  | 22  | 29                                                             |
| 30                  | 28           | 27          | 29    | 29  | 22  | 30                                                             |
| 30                  | 28           | 27          | 29    | 29  | 22  | 30                                                             |
| 30                  | 28           | 27          | 29    | 29  | 22  | 30                                                             |
| 30                  | 28           | 27          | 29    | 29  | 22  | 30                                                             |
| 30                  | 28           | 27          | 29    | 29  | 22  | 30                                                             |
| 30                  | 28           | 27          | 29    | 29  | 22  | 30                                                             |
| 29                  | 27           | 26          | 28    | 28  | 22  | 29                                                             |
| 29                  | 27           | 26          | 28    | 28  | 22  | 29                                                             |

| BPI Worst Pain Intensity (0-10 scale) | BPI Number of Hours Pain Lasts on Days with Pain (0-24 hours) | BPI Number of Days Pain Interferes with Mood and/or Activities (0-7) | BPI Relief from Pain Medication in Past Week (0-100%) | BPI Overall Satisfaction with Pain Treatment (0-10) | General activity |
|---------------------------------------|---------------------------------------------------------------|----------------------------------------------------------------------|-------------------------------------------------------|-----------------------------------------------------|------------------|
| 30                                    | 29                                                            | 30                                                                   | 21                                                    | 23                                                  | 30               |
| 30                                    | 29                                                            | 30                                                                   | 21                                                    | 23                                                  | 30               |
| 30                                    | 29                                                            | 30                                                                   | 21                                                    | 23                                                  | 30               |
| 30                                    | 29                                                            | 30                                                                   | 21                                                    | 23                                                  | 30               |
| 30                                    | 29                                                            | 30                                                                   | 21                                                    | 23                                                  | 30               |
| 30                                    | 29                                                            | 30                                                                   | 21                                                    | 23                                                  | 30               |
| 30                                    | 29                                                            | 30                                                                   | 21                                                    | 23                                                  | 30               |
| 30                                    | 29                                                            | 30                                                                   | 21                                                    | 23                                                  | 30               |
| 30                                    | 29                                                            | 30                                                                   | 21                                                    | 23                                                  | 30               |
| 30                                    | 29                                                            | 30                                                                   | 21                                                    | 23                                                  | 30               |
| 30                                    | 29                                                            | 30                                                                   | 21                                                    | 23                                                  | 30               |
| 28                                    | 27                                                            | 28                                                                   | 21                                                    | 23                                                  | 28               |
| 29                                    | 28                                                            | 29                                                                   | 21                                                    | 23                                                  | 29               |
| 29                                    | 28                                                            | 29                                                                   | 21                                                    | 23                                                  | 29               |
| 29                                    | 28                                                            | 29                                                                   | 21                                                    | 23                                                  | 29               |
| 22                                    | 22                                                            | 22                                                                   | 14                                                    | 16                                                  | 22               |
| 30                                    | 29                                                            | 30                                                                   | 21                                                    | 23                                                  | 30               |
| 30                                    | 29                                                            | 30                                                                   | 21                                                    | 23                                                  | 30               |
| 29                                    | 29                                                            | 29                                                                   | 20                                                    | 22                                                  | 29               |
| 30                                    | 29                                                            | 30                                                                   | 21                                                    | 23                                                  | 30               |
| 21                                    | 20                                                            | 21                                                                   | 21                                                    | 21                                                  | 21               |
| 23                                    | 22                                                            | 23                                                                   | 21                                                    | 23                                                  | 23               |
| 30                                    | 29                                                            | 30                                                                   | 21                                                    | 23                                                  | 30               |
| 30                                    | 29                                                            | 30                                                                   | 21                                                    | 23                                                  | 30               |
| 30                                    | 29                                                            | 30                                                                   | 21                                                    | 23                                                  | 30               |
| 26                                    | 25                                                            | 26                                                                   | 17                                                    | 19                                                  | 26               |
| 30                                    | 29                                                            | 30                                                                   | 21                                                    | 23                                                  | 30               |
| 30                                    | 29                                                            | 30                                                                   | 21                                                    | 23                                                  | 30               |
| 29                                    | 28                                                            | 29                                                                   | 20                                                    | 22                                                  | 29               |
| 30                                    | 29                                                            | 30                                                                   | 21                                                    | 23                                                  | 30               |
| 30                                    | 29                                                            | 30                                                                   | 21                                                    | 23                                                  | 30               |
| 30                                    | 29                                                            | 30                                                                   | 21                                                    | 23                                                  | 30               |
| 30                                    | 29                                                            | 30                                                                   | 21                                                    | 23                                                  | 30               |
| 30                                    | 29                                                            | 30                                                                   | 21                                                    | 23                                                  | 30               |
| 30                                    | 29                                                            | 30                                                                   | 21                                                    | 23                                                  | 30               |
| 29                                    | 28                                                            | 29                                                                   | 20                                                    | 22                                                  | 29               |
| 29                                    | 28                                                            | 29                                                                   | 20                                                    | 22                                                  | 29               |



| Normal work | Walking ability | Sexual ability | Mood | Relations w/<br>others | Enjoyment of<br>life | Sleep |
|-------------|-----------------|----------------|------|------------------------|----------------------|-------|
| 30          | 30              | 26             | 30   | 30                     | 29                   | 30    |
| 30          | 30              | 26             | 30   | 30                     | 29                   | 30    |
| 30          | 30              | 26             | 30   | 30                     | 29                   | 30    |
| 30          | 30              | 26             | 30   | 30                     | 29                   | 30    |
| 30          | 30              | 26             | 30   | 30                     | 29                   | 30    |
| 30          | 30              | 26             | 30   | 30                     | 29                   | 30    |
| 30          | 30              | 26             | 30   | 30                     | 29                   | 30    |
| 30          | 30              | 26             | 30   | 30                     | 29                   | 30    |
| 30          | 30              | 26             | 30   | 30                     | 29                   | 30    |
| 30          | 30              | 26             | 30   | 30                     | 29                   | 30    |
| 28          | 28              | 24             | 28   | 28                     | 27                   | 28    |
| 29          | 29              | 25             | 29   | 29                     | 28                   | 29    |
| 29          | 29              | 25             | 29   | 29                     | 28                   | 29    |
| 29          | 29              | 25             | 29   | 29                     | 28                   | 29    |
| 22          | 22              | 20             | 22   | 22                     | 22                   | 22    |
| 30          | 30              | 26             | 30   | 30                     | 29                   | 30    |
| 30          | 30              | 26             | 30   | 30                     | 29                   | 30    |
| 29          | 29              | 25             | 29   | 29                     | 28                   | 29    |
| 30          | 30              | 26             | 30   | 30                     | 29                   | 30    |
| 21          | 21              | 17             | 21   | 21                     | 20                   | 21    |
| 23          | 23              | 19             | 23   | 23                     | 22                   | 23    |
| 30          | 30              | 26             | 30   | 30                     | 29                   | 30    |
| 30          | 30              | 26             | 30   | 30                     | 29                   | 30    |
| 30          | 30              | 26             | 30   | 30                     | 29                   | 30    |
| 26          | 26              | 26             | 26   | 26                     | 26                   | 26    |
| 30          | 30              | 26             | 30   | 30                     | 29                   | 30    |
| 30          | 30              | 26             | 30   | 30                     | 29                   | 30    |
| 29          | 29              | 26             | 29   | 29                     | 29                   | 29    |
| 30          | 30              | 26             | 30   | 30                     | 29                   | 30    |
| 30          | 30              | 26             | 30   | 30                     | 29                   | 30    |
| 30          | 30              | 26             | 30   | 30                     | 29                   | 30    |
| 30          | 30              | 26             | 30   | 30                     | 29                   | 30    |
| 30          | 30              | 26             | 30   | 30                     | 29                   | 30    |
| 30          | 30              | 26             | 30   | 30                     | 29                   | 30    |
| 29          | 29              | 25             | 29   | 29                     | 28                   | 29    |
| 29          | 29              | 25             | 29   | 29                     | 28                   | 29    |

| BPI                                |                                     |                        |
|------------------------------------|-------------------------------------|------------------------|
| BPI Physical interferences average | Psychological interferences average | BPI Average pain score |
| 30                                 | 30                                  | 30                     |
| 30                                 | 30                                  | 30                     |
| 30                                 | 30                                  | 30                     |
| 30                                 | 30                                  | 30                     |
| 30                                 | 30                                  | 30                     |
| 30                                 | 30                                  | 30                     |
| 30                                 | 30                                  | 30                     |
| 30                                 | 30                                  | 30                     |
| 30                                 | 30                                  | 30                     |
| 30                                 | 30                                  | 30                     |
| 28                                 | 28                                  | 28                     |
| 29                                 | 29                                  | 29                     |
| 29                                 | 29                                  | 29                     |
| 29                                 | 29                                  | 29                     |
| 22                                 | 22                                  | 22                     |
| 30                                 | 30                                  | 30                     |
| 30                                 | 30                                  | 30                     |
| 29                                 | 29                                  | 29                     |
| 30                                 | 30                                  | 30                     |
| 21                                 | 21                                  | 21                     |
| 23                                 | 23                                  | 23                     |
|                                    |                                     |                        |
| 30                                 | 30                                  | 30                     |
| 30                                 | 30                                  | 30                     |
| 30                                 | 30                                  | 30                     |
| 26                                 | 26                                  | 26                     |
| 30                                 | 30                                  | 30                     |
| 30                                 | 30                                  | 30                     |
| 29                                 | 29                                  | 29                     |
| 30                                 | 30                                  | 30                     |
| 30                                 | 30                                  | 30                     |
| 30                                 | 30                                  | 30                     |
| 30                                 | 30                                  | 30                     |
| 30                                 | 30                                  | 30                     |
| 30                                 | 30                                  | 30                     |
| 30                                 | 30                                  | 30                     |
| 29                                 | 29                                  | 29                     |
| 29                                 | 29                                  | 29                     |

## Supplementary Table 2. Confidence interval

|                                                                      | Age                 | Gender             |
|----------------------------------------------------------------------|---------------------|--------------------|
| Age                                                                  |                     | -0.5410 to 0.1478  |
| Gender                                                               | -0.5410 to 0.1478   |                    |
| UCSFOCPQ 1                                                           | -0.6674 to -0.05158 | -0.2633 to 0.4501  |
| UCSFOCPQ 2                                                           | -0.4584 to 0.2534   | -0.04697 to 0.6090 |
| UCSFOCPQ 3                                                           | -0.5245 to 0.1702   | -0.3628 to 0.3578  |
| UCSFOCPQ 4                                                           | -0.4615 to 0.2498   | -0.1046 to 0.5713  |
| UCSFOCPQ 5                                                           | -0.4459 to 0.2681   | -0.2635 to 0.4499  |
| UCSFOCPQ 6                                                           | -0.6001 to 0.06107  | -0.07531 to 0.5908 |
| UCSFOCPQ 7                                                           | -0.3464 to 0.3740   | -0.09287 to 0.5792 |
| UCSFOCPQ 8                                                           | -0.2636 to 0.4498   | -0.09753 to 0.5761 |
| <b>UCSFOCPQ average</b>                                              | -0.4759 to 0.2323   | -0.09075 to 0.5806 |
| Nodal Status                                                         | -0.6263 to 0.04866  | -0.1674 to 0.5476  |
| Tumor stage                                                          | -0.4742 to 0.2480   | -0.1791 to 0.5283  |
| Stage                                                                | -0.6634 to -0.03010 | -0.1357 to 0.5596  |
| PNI                                                                  | -0.5254 to 0.1829   | -0.3446 to 0.3880  |
| DOI                                                                  | -0.5720 to 0.2438   | -0.4408 to 0.4020  |
| <b>BPI Average Pain Intensity over 24 hours (0-10 scale)</b>         | -0.4161 to 0.3017   | -0.05565 to 0.6035 |
| BPI Worst Pain Intensity (0-10 scale)                                | -0.2913 to 0.4255   | -0.08904 to 0.5818 |
| BPI Number of Hours Pain Lasts on Days with Pain (0-24 hours)        | -0.2775 to 0.4492   | -0.3647 to 0.3683  |
| BPI Number of Days Pain Interferes with Mood and/or Activities (0-7) | -0.4045 to 0.3144   | -0.2714 to 0.4430  |
| BPI Relief from Pain Medication in Past Week (0-100%)                | -0.5205 to 0.3336   | -0.3207 to 0.5310  |
| BPI Overall Satisfaction with Pain Treatment (0-10)                  | -0.3610 to 0.4609   | -0.3130 to 0.5025  |
| General activity                                                     | -0.4653 to 0.2452   | -0.06616 to 0.5968 |
| Normal work                                                          | -0.4066 to 0.3121   | -0.2042 to 0.4985  |
| Walking ability                                                      | -0.2419 to 0.4680   | -0.4185 to 0.2991  |
| Sexual ability                                                       | -0.4797 to 0.2865   | -0.2927 to 0.4745  |
| Mood                                                                 | -0.6274 to 0.01730  | -0.1596 to 0.5324  |
| Relations w/ others                                                  | -0.4384 to 0.2768   | -0.3168 to 0.4022  |
| Enjoyment of life                                                    | -0.4485 to 0.2783   | -0.1002 to 0.5838  |
| Sleep                                                                | -0.5266 to 0.1674   | -0.06906 to 0.5949 |
| BPI Physical interferences average                                   | -0.4147 to 0.3032   | -0.1993 to 0.5023  |
| BPI Psychological interferences average                              | -0.5419 to 0.1465   | -0.1145 to 0.5645  |
| <b>BPI Average pain score</b>                                        | -0.4918 to 0.2127   | -0.1118 to 0.5663  |
| BPI Occurrence of Pain (0= No; 1= Yes)                               | -0.5269 to 0.1669   | -0.1326 to 0.5518  |
| BPI Pain Related to Cancer (0= No; 1= Yes)                           | -0.5246 to 0.1701   | -0.06684 to 0.5963 |
| BPI Pain NOT Related to Cancer (0= No; 1= Yes)                       | -0.4112 to 0.3201   | -0.2784 to 0.4485  |
| BPI Both Cancer and Non-Cancer Related Pain (0= No; 1= Yes)          | -0.4211 to 0.3093   | -0.2094 to 0.5052  |

| UCSFOCPQ 1          | UCSFOCPQ 2          | UCSFOCPQ 3          | UCSFOCPQ 4         | UCSFOCPQ 5          |
|---------------------|---------------------|---------------------|--------------------|---------------------|
| -0.6674 to -0.05158 | -0.4584 to 0.2534   | -0.5245 to 0.1702   | -0.4615 to 0.2498  | -0.4459 to 0.2681   |
| -0.2633 to 0.4501   | -0.04697 to 0.6090  | -0.3628 to 0.3578   | -0.1046 to 0.5713  | -0.2635 to 0.4499   |
|                     | 0.2378 to 0.7602    | 0.6535 to 0.9114    | 0.3464 to 0.8061   | 0.5591 to 0.8823    |
| 0.2378 to 0.7602    |                     | 0.2163 to 0.7505    | 0.7375 to 0.9353   | 0.2754 to 0.7768    |
| 0.6535 to 0.9114    | 0.2163 to 0.7505    |                     | 0.2815 to 0.7793   | 0.4566 to 0.8475    |
| 0.3464 to 0.8061    | 0.7375 to 0.9353    | 0.2815 to 0.7793    |                    | 0.2845 to 0.7806    |
| 0.5591 to 0.8823    | 0.2754 to 0.7768    | 0.4566 to 0.8475    | 0.2845 to 0.7806   |                     |
| 0.3596 to 0.8113    | 0.6794 to 0.9190    | 0.1822 to 0.7346    | 0.7019 to 0.9254   | 0.2199 to 0.7522    |
| 0.03279 to 0.6568   | 0.4876 to 0.8584    | -0.03992 to 0.6135  | 0.4744 to 0.8538   | -0.05135 to 0.6063  |
| 0.1215 to 0.7046    | 0.7527 to 0.9395    | 0.08065 to 0.6833   | 0.5925 to 0.8929   | 0.1833 to 0.7351    |
| 0.5091 to 0.8658    | 0.8771 to 0.9715    | 0.4166 to 0.8330    | 0.8717 to 0.9701   | 0.4582 to 0.8481    |
| -0.03723 to 0.6332  | 0.2437 to 0.7750    | -0.1935 to 0.5285   | 0.2045 to 0.7580   | -0.1500 to 0.5600   |
| -0.1071 to 0.5792   | 0.1237 to 0.7129    | -0.1853 to 0.5236   | -0.01573 to 0.6370 | 0.01395 to 0.6543   |
| 0.1345 to 0.7183    | 0.1737 to 0.7371    | 0.02516 to 0.6606   | 0.2369 to 0.7658   | -0.009550 to 0.6406 |
| 0.1024 to 0.7022    | -0.2142 to 0.5014   | -0.1132 to 0.5751   | -0.03619 to 0.6246 | -0.1666 to 0.5374   |
| 0.2532 to 0.8204    | 0.1279 to 0.7730    | 0.1571 to 0.7848    | 0.05314 to 0.7409  | 0.1746 to 0.7916    |
| 0.2282 to 0.7559    | 0.7366 to 0.9351    | 0.1886 to 0.7376    | 0.4672 to 0.8513   | 0.3134 to 0.7927    |
| -0.03925 to 0.6139  | 0.6464 to 0.9093    | 0.04676 to 0.6647   | 0.4614 to 0.8493   | 0.08639 to 0.6863   |
| -0.02941 to 0.6287  | 0.3799 to 0.8239    | 0.03323 to 0.6652   | 0.1076 to 0.7048   | 0.2543 to 0.7734    |
| -0.04488 to 0.6104  | 0.5491 to 0.8790    | -0.08468 to 0.5847  | 0.2738 to 0.7760   | 0.05961 to 0.6718   |
| -0.6621 to 0.1268   | -0.6600 to 0.1303   | -0.5449 to 0.3031   | -0.6868 to 0.08196 | -0.6875 to 0.08056  |
| -0.7152 to -0.02120 | -0.7105 to -0.01172 | -0.6114 to 0.1638   | -0.7915 to -0.1964 | -0.7308 to -0.05379 |
|                     |                     |                     |                    |                     |
| -0.07033 to 0.5941  | 0.3899 to 0.8230    | -0.1421 to 0.5451   | 0.1740 to 0.7307   | -0.1176 to 0.5623   |
| -0.3757 to 0.3447   | 0.1711 to 0.7293    | -0.4153 to 0.3027   | -0.02030 to 0.6256 | -0.3732 to 0.3472   |
| -0.3784 to 0.3419   | -0.1302 to 0.5535   | -0.3620 to 0.3585   | -0.08959 to 0.5814 | -0.3496 to 0.3709   |
| -0.3014 to 0.4671   | 0.2222 to 0.7792    | -0.3703 to 0.4042   | 0.05834 to 0.7043  | -0.3814 to 0.3933   |
| 0.0003838 to 0.6380 | 0.4349 to 0.8398    | -0.1588 to 0.5329   | 0.2481 to 0.7648   | -0.1320 to 0.5523   |
| -0.04120 to 0.6127  | 0.1530 to 0.7204    | -0.3258 to 0.3938   | 0.2023 to 0.7441   | -0.08937 to 0.5815  |
| -0.08961 to 0.5908  | 0.3766 to 0.8226    | -0.2556 to 0.4679   | 0.06696 to 0.6836  | -0.09197 to 0.5893  |
| 0.1231 to 0.7055    | 0.2977 to 0.7862    | -0.07072 to 0.5938  | 0.2567 to 0.7686   | 0.08321 to 0.6846   |
| -0.2331 to 0.4753   | 0.3515 to 0.8081    | -0.2923 to 0.4246   | 0.1709 to 0.7292   | -0.2723 to 0.4422   |
| 0.06006 to 0.6721   | 0.4573 to 0.8478    | -0.1758 to 0.5203   | 0.3039 to 0.7888   | -0.006583 to 0.6338 |
| -0.002879 to 0.6360 | 0.5411 to 0.8764    | -0.1731 to 0.5223   | 0.3411 to 0.8040   | -0.04200 to 0.6122  |
| -0.01214 to 0.6305  | 0.3553 to 0.8096    | -0.003622 to 0.6356 | 0.1807 to 0.7339   | 0.01648 to 0.6474   |
| 0.02703 to 0.6535   | 0.4492 to 0.8449    | 0.04090 to 0.6614   | 0.2584 to 0.7694   | 0.06495 to 0.6748   |
| -0.3899 to 0.3427   | -0.2569 to 0.4668   | -0.2962 to 0.4328   | -0.1785 to 0.5287  | -0.4996 to 0.2165   |
| -0.3477 to 0.3850   | -0.1659 to 0.5380   | -0.2455 to 0.4763   | -0.09247 to 0.5889 | -0.4583 to 0.2670   |

| UCSFOCPQ 6          | UCSFOCPQ 7           | UCSFOCPQ 8          | UCSFOCPQ average   | Nodal Status       |
|---------------------|----------------------|---------------------|--------------------|--------------------|
| -0.6001 to 0.06107  | -0.3464 to 0.3740    | -0.2636 to 0.4498   | -0.4759 to 0.2323  | -0.6263 to 0.04866 |
| -0.07531 to 0.5908  | -0.09287 to 0.5792   | -0.09753 to 0.5761  | -0.09075 to 0.5806 | -0.1674 to 0.5476  |
| 0.3596 to 0.8113    | 0.03279 to 0.6568    | 0.1215 to 0.7046    | 0.5091 to 0.8658   | -0.03723 to 0.6332 |
| 0.6794 to 0.9190    | 0.4876 to 0.8584     | 0.7527 to 0.9395    | 0.8771 to 0.9715   | 0.2437 to 0.7750   |
| 0.1822 to 0.7346    | -0.03992 to 0.6135   | 0.08065 to 0.6833   | 0.4166 to 0.8330   | -0.1935 to 0.5285  |
| 0.7019 to 0.9254    | 0.4744 to 0.8538     | 0.5925 to 0.8929    | 0.8717 to 0.9701   | 0.2045 to 0.7580   |
| 0.2199 to 0.7522    | -0.05135 to 0.6063   | 0.1833 to 0.7351    | 0.4582 to 0.8481   | -0.1500 to 0.5600  |
|                     | 0.2511 to 0.7661     | 0.4600 to 0.8488    | 0.7523 to 0.9394   | 0.4456 to 0.8520   |
| 0.2511 to 0.7661    |                      | 0.3844 to 0.8209    | 0.5535 to 0.8805   | -0.1110 to 0.5867  |
| 0.4600 to 0.8488    | 0.3844 to 0.8209     |                     | 0.7381 to 0.9355   | 0.05722 to 0.6865  |
| 0.7523 to 0.9394    | 0.5535 to 0.8805     | 0.7381 to 0.9355    |                    | 0.2029 to 0.7573   |
| 0.4456 to 0.8520    | -0.1110 to 0.5867    | 0.05722 to 0.6865   | 0.2029 to 0.7573   |                    |
| -0.004278 to 0.6437 | -0.06018 to 0.6097   | 0.01963 to 0.6575   | 0.07255 to 0.6866  | 0.02814 to 0.6708  |
| 0.3478 to 0.8116    | 0.05776 to 0.6786    | 0.06152 to 0.6807   | 0.2717 to 0.7808   | 0.5215 to 0.8769   |
| -0.01394 to 0.6380  | -0.1497 to 0.5497    | -0.2062 to 0.5077   | -0.05382 to 0.6137 | -0.06456 to 0.6165 |
| -0.03006 to 0.7010  | -0.1047 to 0.6608    | 0.04459 to 0.7370   | 0.1724 to 0.7908   | 0.2275 to 0.8196   |
| 0.4157 to 0.8327    | 0.4289 to 0.8376     | 0.6003 to 0.8953    | 0.6841 to 0.9203   | 0.004881 to 0.6578 |
| 0.3040 to 0.7888    | 0.4365 to 0.8403     | 0.5213 to 0.8699    | 0.5452 to 0.8778   | -0.1282 to 0.5751  |
| 0.04739 to 0.6730   | -0.0007334 to 0.6458 | 0.2222 to 0.7594    | 0.2584 to 0.7752   | 0.01617 to 0.6731  |
| 0.2511 to 0.7662    | 0.1793 to 0.7332     | 0.5276 to 0.8719    | 0.4100 to 0.8306   | 0.2200 to 0.7648   |
| -0.5048 to 0.3524   | -0.6054 to 0.2187    | -0.7809 to -0.1230  | -0.6963 to 0.06378 | -0.4537 to 0.4092  |
| -0.5914 to 0.1942   | -0.6653 to 0.07421   | -0.7001 to 0.009114 | -0.7589 to -0.1165 | -0.5979 to 0.1844  |
|                     |                      |                     |                    |                    |
| 0.1765 to 0.7319    | 0.1638 to 0.7257     | 0.3379 to 0.8027    | 0.2776 to 0.7777   | 0.08346 to 0.7002  |
| -0.08919 to 0.5817  | 0.1444 to 0.7162     | 0.1320 to 0.7100    | 0.006697 to 0.6417 | 0.06472 to 0.6904  |
| -0.3230 to 0.3965   | 0.02710 to 0.6536    | 0.09873 to 0.6929   | -0.1155 to 0.5638  | -0.2672 to 0.4701  |
| 0.1656 to 0.7550    | -0.09437 to 0.6186   | 0.1068 to 0.7281    | 0.04801 to 0.6990  | 0.3901 to 0.8531   |
| 0.2826 to 0.7798    | 0.1840 to 0.7354     | 0.2305 to 0.7570    | 0.3053 to 0.7894   | 0.2959 to 0.7965   |
| 0.1064 to 0.6969    | 0.08790 to 0.6871    | 0.1135 to 0.7005    | 0.1572 to 0.7225   | 0.2453 to 0.7757   |
| 0.07818 to 0.6896   | 0.1673 to 0.7342     | 0.2271 to 0.7615    | 0.2019 to 0.7502   | 0.05765 to 0.6952  |
| 0.3661 to 0.8138    | 0.1224 to 0.7051     | 0.2258 to 0.7549    | 0.3400 to 0.8035   | -0.05747 to 0.6209 |
| 0.09854 to 0.6928   | 0.2063 to 0.7459     | 0.3654 to 0.8136    | 0.2066 to 0.7461   | 0.2061 to 0.7587   |
| 0.3270 to 0.7983    | 0.2404 to 0.7614     | 0.3128 to 0.7925    | 0.3786 to 0.8187   | 0.2124 to 0.7614   |
| 0.3118 to 0.7921    | 0.3168 to 0.7941     | 0.4429 to 0.8426    | 0.4247 to 0.8360   | 0.2460 to 0.7760   |
| 0.1160 to 0.7018    | 0.1306 to 0.7093     | 0.2758 to 0.7769    | 0.2853 to 0.7810   | -0.2655 to 0.4715  |
| 0.1720 to 0.7297    | 0.1943 to 0.7403     | 0.3609 to 0.8118    | 0.3726 to 0.8164   | -0.2029 to 0.5214  |
| -0.2353 to 0.4846   | -0.1245 to 0.5674    | -0.1473 to 0.5514   | -0.2201 to 0.4968  | -0.3899 to 0.3701  |
| -0.1684 to 0.5361   | -0.04447 to 0.6195   | -0.05211 to 0.6148  | -0.1306 to 0.5631  | -0.3335 to 0.4247  |

| Tumor stage        | Stage               | PNI                | DOI                | BPI Average Pain Intensity over 24 hours (0-10 scale) |
|--------------------|---------------------|--------------------|--------------------|-------------------------------------------------------|
| -0.5468 to 0.1843  | -0.6634 to -0.03010 | -0.5254 to 0.1829  | -0.5720 to 0.2438  | -0.4161 to 0.3017                                     |
| -0.1851 to 0.5462  | -0.1357 to 0.5596   | -0.3446 to 0.3880  | -0.4408 to 0.4020  | -0.05565 to 0.6035                                    |
| -0.08945 to 0.6110 | 0.1345 to 0.7183    | 0.1024 to 0.7022   | 0.2532 to 0.8204   | 0.2282 to 0.7559                                      |
| 0.08449 to 0.7088  | 0.1737 to 0.7371    | -0.2142 to 0.5014  | 0.1279 to 0.7730   | 0.7366 to 0.9351                                      |
| -0.1914 to 0.5415  | 0.02516 to 0.6606   | -0.1132 to 0.5751  | 0.1571 to 0.7848   | 0.1886 to 0.7376                                      |
| -0.02757 to 0.6484 | 0.2369 to 0.7658    | -0.03619 to 0.6246 | 0.05314 to 0.7409  | 0.4672 to 0.8513                                      |
| 0.005151 to 0.6670 | -0.009550 to 0.6406 | -0.1666 to 0.5374  | 0.1746 to 0.7916   | 0.3134 to 0.7927                                      |
| 0.01329 to 0.6715  | 0.3478 to 0.8116    | -0.01394 to 0.6380 | -0.03006 to 0.7010 | 0.4157 to 0.8327                                      |
| -0.04751 to 0.6367 | 0.05776 to 0.6786   | -0.1497 to 0.5497  | -0.1047 to 0.6608  | 0.4289 to 0.8376                                      |
| -0.03350 to 0.6450 | 0.06152 to 0.6807   | -0.2062 to 0.5077  | 0.04459 to 0.7370  | 0.6003 to 0.8953                                      |
| 0.05076 to 0.6916  | 0.2717 to 0.7808    | -0.05382 to 0.6137 | 0.1724 to 0.7908   | 0.6841 to 0.9203                                      |
| 0.08770 to 0.7189  | 0.5215 to 0.8769    | -0.06456 to 0.6165 | 0.2275 to 0.8196   | 0.004881 to 0.6578                                    |
|                    | 0.2233 to 0.7599    | -0.2066 to 0.5074  | 0.2132 to 0.8061   | -0.01571 to 0.6370                                    |
| 0.3323 to 0.8163   |                     | 0.2376 to 0.7662   | 0.2261 to 0.8108   | 0.01338 to 0.6539                                     |
| -0.1777 to 0.5515  | 0.2376 to 0.7662    |                    | -0.1192 to 0.6524  | -0.2079 to 0.5063                                     |
| 0.2923 to 0.8488   | 0.2261 to 0.8108    | -0.1192 to 0.6524  |                    | -0.01134 to 0.7104                                    |
| -0.04248 to 0.6397 | 0.01338 to 0.6539   | -0.2079 to 0.5063  | -0.01134 to 0.7104 |                                                       |
| -0.1812 to 0.5490  | -0.1662 to 0.5378   | -0.3345 to 0.3977  | -0.3242 to 0.5102  | 0.7061 to 0.9266                                      |
| -0.1763 to 0.5643  | -0.07673 to 0.6089  | -0.3419 to 0.4035  | 0.07573 to 0.7510  | 0.4665 to 0.8550                                      |
| 0.1087 to 0.7208   | 0.05020 to 0.6745   | -0.03846 to 0.6232 | 0.1648 to 0.7878   | 0.4710 to 0.8526                                      |
| -0.6582 to 0.1881  | -0.4499 to 0.4131   | -0.6074 to 0.2158  | -0.7136 to 0.2797  | -0.7801 to -0.1210                                    |
| -0.4932 to 0.3659  | -0.5545 to 0.2464   | -0.6706 to 0.06463 | -0.7200 to 0.1777  | -0.7421 to -0.07850                                   |
| 0.02334 to 0.6770  | 0.1572 to 0.7293    | -0.1608 to 0.5417  | 0.03694 to 0.7335  | 0.3799 to 0.8192                                      |
| -0.03441 to 0.6444 | -0.03135 to 0.6276  | -0.2648 to 0.4602  | 0.2294 to 0.8120   | 0.1083 to 0.6978                                      |
| -0.1208 to 0.5907  | -0.1615 to 0.5412   | -0.3373 to 0.3950  | 0.2010 to 0.8016   | -0.1771 to 0.5193                                     |
| -0.08731 to 0.6578 | 0.2412 to 0.7939    | -0.2312 to 0.5373  | 0.1966 to 0.8177   | 0.005318 to 0.6765                                    |
| 0.1788 to 0.7534   | 0.2223 to 0.7594    | -0.1520 to 0.5480  | 0.3409 to 0.8495   | 0.2495 to 0.7655                                      |
| 0.03014 to 0.6806  | 0.1842 to 0.7421    | -0.05234 to 0.6147 | 0.5452 to 0.9071   | 0.01932 to 0.6491                                     |
| 0.1853 to 0.7636   | -0.06068 to 0.6189  | -0.3916 to 0.3543  | 0.2744 to 0.8277   | 0.2854 to 0.7865                                      |
| 0.02395 to 0.6773  | 0.02580 to 0.6610   | -0.2451 to 0.4766  | -0.03702 to 0.6974 | 0.1852 to 0.7360                                      |
| 0.03596 to 0.6838  | 0.1962 to 0.7476    | -0.1947 to 0.5165  | 0.3325 to 0.8468   | 0.2318 to 0.7576                                      |
| 0.1866 to 0.7569   | 0.1639 to 0.7325    | -0.2091 to 0.5054  | 0.4059 to 0.8693   | 0.2804 to 0.7789                                      |
| 0.1553 to 0.7428   | 0.2085 to 0.7532    | -0.1855 to 0.5235  | 0.4027 to 0.8683   | 0.4152 to 0.8325                                      |
| -0.3208 to 0.4363  | -0.2700 to 0.4557   | -0.4115 to 0.3197  | -0.1895 to 0.6091  | 0.2540 to 0.7674                                      |
| -0.2058 to 0.5309  | -0.1917 to 0.5187   | -0.3558 to 0.3771  | -0.09921 to 0.6639 | 0.3664 to 0.8140                                      |
| -0.5851 to 0.1462  | -0.3731 to 0.3731   | -0.4021 to 0.3433  | -0.6264 to 0.1624  | -0.3388 to 0.3936                                     |
| -0.5081 to 0.2517  | -0.3053 to 0.4371   | -0.3579 to 0.3881  | -0.5676 to 0.2499  | -0.2463 to 0.4756                                     |

| BPI Worst Pain Intensity (0-10 scale) | BPI Number of Hours Pain Lasts on Days with Pain (0-24 hours) | BPI Number of Days Pain Interferes with Mood and/or Activities (0-7) | BPI Relief from Pain Medication in Past Week (0-100%) | BPI Overall Satisfaction with Pain Treatment (0-10) |
|---------------------------------------|---------------------------------------------------------------|----------------------------------------------------------------------|-------------------------------------------------------|-----------------------------------------------------|
| -0.2913 to 0.4255                     | -0.2775 to 0.4492                                             | -0.4045 to 0.3144                                                    | -0.5205 to 0.3336                                     | -0.3610 to 0.4609                                   |
| -0.08904 to 0.5818                    | -0.3647 to 0.3683                                             | -0.2714 to 0.4430                                                    | -0.3207 to 0.5310                                     | -0.3130 to 0.5025                                   |
| -0.03925 to 0.6139                    | -0.02941 to 0.6287                                            | -0.04488 to 0.6104                                                   | -0.6621 to 0.1268                                     | -0.7152 to -0.02120                                 |
| 0.6464 to 0.9093                      | 0.3799 to 0.8239                                              | 0.5491 to 0.8790                                                     | -0.6600 to 0.1303                                     | -0.7105 to -0.01172                                 |
| 0.04676 to 0.6647                     | 0.03323 to 0.6652                                             | -0.08468 to 0.5847                                                   | -0.5449 to 0.3031                                     | -0.6114 to 0.1638                                   |
| 0.4614 to 0.8493                      | 0.1076 to 0.7048                                              | 0.2738 to 0.7760                                                     | -0.6868 to 0.08196                                    | -0.7915 to -0.1964                                  |
| 0.08639 to 0.6863                     | 0.2543 to 0.7734                                              | 0.05961 to 0.6718                                                    | -0.6875 to 0.08056                                    | -0.7308 to -0.05379                                 |
| 0.3040 to 0.7888                      | 0.04739 to 0.6730                                             | 0.2511 to 0.7662                                                     | -0.5048 to 0.3524                                     | -0.5914 to 0.1942                                   |
| 0.4365 to 0.8403                      | -0.0007334 to 0.6458                                          | 0.1793 to 0.7332                                                     | -0.6054 to 0.2187                                     | -0.6653 to 0.07421                                  |
| 0.5213 to 0.8699                      | 0.2222 to 0.7594                                              | 0.5276 to 0.8719                                                     | -0.7809 to -0.1230                                    | -0.7001 to 0.009114                                 |
| 0.5452 to 0.8778                      | 0.2584 to 0.7752                                              | 0.4100 to 0.8306                                                     | -0.6963 to 0.06378                                    | -0.7589 to -0.1165                                  |
| -0.1282 to 0.5751                     | 0.01617 to 0.6731                                             | 0.2200 to 0.7648                                                     | -0.4537 to 0.4092                                     | -0.5979 to 0.1844                                   |
| -0.1291 to 0.5641                     | -0.1562 to 0.5556                                             | 0.1568 to 0.7291                                                     | -0.6589 to 0.1324                                     | -0.4891 to 0.3290                                   |
| -0.1662 to 0.5378                     | -0.07673 to 0.6089                                            | 0.05020 to 0.6745                                                    | -0.4499 to 0.4131                                     | -0.5545 to 0.2464                                   |
| -0.3345 to 0.3977                     | -0.3419 to 0.4035                                             | -0.03846 to 0.6232                                                   | -0.6074 to 0.2158                                     | -0.6706 to 0.06463                                  |
| -0.3242 to 0.5102                     | 0.07573 to 0.7510                                             | 0.1648 to 0.7878                                                     | -0.7136 to 0.2797                                     | -0.7200 to 0.1777                                   |
| 0.7061 to 0.9266                      | 0.4665 to 0.8550                                              | 0.4710 to 0.8526                                                     | -0.7801 to -0.1210                                    | -0.7421 to -0.07850                                 |
|                                       | 0.2871 to 0.7873                                              | 0.3063 to 0.7898                                                     | -0.7711 to -0.09869                                   | -0.6835 to 0.04083                                  |
| 0.2871 to 0.7873                      |                                                               | 0.2544 to 0.7735                                                     | -0.7013 to 0.08069                                    | -0.7738 to -0.1297                                  |
| 0.3063 to 0.7898                      | 0.2544 to 0.7735                                              |                                                                      | -0.7872 to -0.1392                                    | -0.7338 to -0.06036                                 |
| -0.7711 to -0.09869                   | -0.7013 to 0.08069                                            | -0.7872 to -0.1392                                                   |                                                       | 0.5753 to 0.9185                                    |
| -0.6835 to 0.04083                    | -0.7738 to -0.1297                                            | -0.7338 to -0.06036                                                  | 0.5753 to 0.9185                                      |                                                     |
| 0.1415 to 0.7148                      | -0.05221 to 0.6147                                            | 0.3403 to 0.8037                                                     | -0.5294 to 0.3226                                     | -0.5123 to 0.3011                                   |
| -0.07712 to 0.5896                    | 0.05464 to 0.6769                                             | 0.3811 to 0.8196                                                     | -0.5382 to 0.3117                                     | -0.5878 to 0.1995                                   |
| -0.2151 to 0.4899                     | -0.2577 to 0.4661                                             | 0.02064 to 0.6498                                                    | -0.6352 to 0.1721                                     | -0.5862 to 0.2019                                   |
| -0.1283 to 0.5970                     | 0.07156 to 0.7199                                             | 0.06954 to 0.7099                                                    | -0.2996 to 0.6283                                     | -0.3792 to 0.5233                                   |
| 0.06307 to 0.6737                     | 0.01718 to 0.6561                                             | 0.3522 to 0.8084                                                     | -0.4932 to 0.3658                                     | -0.5699 to 0.2252                                   |
| -0.1422 to 0.5450                     | 0.08202 to 0.6916                                             | 0.09862 to 0.6928                                                    | -0.5353 to 0.3153                                     | -0.6458 to 0.1081                                   |
| 0.1575 to 0.7295                      | 0.1080 to 0.7126                                              | 0.2725 to 0.7812                                                     | -0.5385 to 0.3352                                     | -0.4902 to 0.3478                                   |
| 0.08174 to 0.6839                     | -0.09792 to 0.5853                                            | -0.04735 to 0.6088                                                   | -0.4062 to 0.4565                                     | -0.4960 to 0.3208                                   |
| 0.04091 to 0.6614                     | 0.05382 to 0.6765                                             | 0.3981 to 0.8261                                                     | -0.5294 to 0.3227                                     | -0.5522 to 0.2495                                   |
| 0.1206 to 0.7042                      | 0.08777 to 0.6946                                             | 0.2517 to 0.7664                                                     | -0.4948 to 0.3641                                     | -0.5662 to 0.2304                                   |
| 0.1984 to 0.7422                      | 0.1646 to 0.7328                                              | 0.4097 to 0.8305                                                     | -0.5574 to 0.2866                                     | -0.6033 to 0.1763                                   |
| 0.2586 to 0.7695                      | -0.02748 to 0.6299                                            | 0.1939 to 0.7401                                                     | -0.5961 to 0.2326                                     | -0.5923 to 0.1929                                   |
| 0.4107 to 0.8308                      | 0.009718 to 0.6518                                            | 0.2404 to 0.7614                                                     | -0.6308 to 0.1792                                     | -0.6250 to 0.1425                                   |
| -0.1522 to 0.5479                     | -0.3915 to 0.3544                                             | -0.3482 to 0.3845                                                    | -0.4599 to 0.4248                                     | -0.4035 to 0.4393                                   |
| -0.01395 to 0.6380                    | -0.3511 to 0.3947                                             | -0.2951 to 0.4338                                                    | -0.5112 to 0.3682                                     | -0.4560 to 0.3860                                   |

| General activity   | Normal work        | Walking ability    | Sexual ability     |
|--------------------|--------------------|--------------------|--------------------|
| -0.4653 to 0.2452  | -0.4066 to 0.3121  | -0.2419 to 0.4680  | -0.4797 to 0.2865  |
| -0.06616 to 0.5968 | -0.2042 to 0.4985  | -0.4185 to 0.2991  | -0.2927 to 0.4745  |
| -0.07033 to 0.5941 | -0.3757 to 0.3447  | -0.3784 to 0.3419  | -0.3014 to 0.4671  |
| 0.3899 to 0.8230   | 0.1711 to 0.7293   | -0.1302 to 0.5535  | 0.2222 to 0.7792   |
| -0.1421 to 0.5451  | -0.4153 to 0.3027  | -0.3620 to 0.3585  | -0.3703 to 0.4042  |
| 0.1740 to 0.7307   | -0.02030 to 0.6256 | -0.08959 to 0.5814 | 0.05834 to 0.7043  |
| -0.1176 to 0.5623  | -0.3732 to 0.3472  | -0.3496 to 0.3709  | -0.3814 to 0.3933  |
| 0.1765 to 0.7319   | -0.08919 to 0.5817 | -0.3230 to 0.3965  | 0.1656 to 0.7550   |
| 0.1638 to 0.7257   | 0.1444 to 0.7162   | 0.02710 to 0.6536  | -0.09437 to 0.6186 |
| 0.3379 to 0.8027   | 0.1320 to 0.7100   | 0.09873 to 0.6929  | 0.1068 to 0.7281   |
| 0.2776 to 0.7777   | 0.006697 to 0.6417 | -0.1155 to 0.5638  | 0.04801 to 0.6990  |
| 0.08346 to 0.7002  | 0.06472 to 0.6904  | -0.2672 to 0.4701  | 0.3901 to 0.8531   |
| 0.01934 to 0.6573  | -0.05929 to 0.6103 | -0.1405 to 0.5562  | -0.1284 to 0.6086  |
| 0.1572 to 0.7293   | -0.03135 to 0.6276 | -0.1615 to 0.5412  | 0.2412 to 0.7939   |
| -0.1608 to 0.5417  | -0.2648 to 0.4602  | -0.3373 to 0.3950  | -0.2312 to 0.5373  |
| 0.03694 to 0.7335  | 0.2294 to 0.8120   | 0.2010 to 0.8016   | 0.1966 to 0.8177   |
| 0.3799 to 0.8192   | 0.1083 to 0.6978   | -0.1771 to 0.5193  | 0.005318 to 0.6765 |
| 0.1415 to 0.7148   | -0.07712 to 0.5896 | -0.2151 to 0.4899  | -0.1283 to 0.5970  |
| -0.05221 to 0.6147 | 0.05464 to 0.6769  | -0.2577 to 0.4661  | 0.07156 to 0.7199  |
| 0.3403 to 0.8037   | 0.3811 to 0.8196   | 0.02064 to 0.6498  | 0.06954 to 0.7099  |
| -0.5294 to 0.3226  | -0.5382 to 0.3117  | -0.6352 to 0.1721  | -0.2996 to 0.6283  |
| -0.5123 to 0.3011  | -0.5878 to 0.1995  | -0.5862 to 0.2019  | -0.3792 to 0.5233  |
|                    | 0.3278 to 0.7986   | -0.01633 to 0.6280 | 0.2558 to 0.7928   |
| 0.3278 to 0.7986   |                    | 0.4525 to 0.8461   | 0.2530 to 0.7917   |
| -0.01633 to 0.6280 | 0.4525 to 0.8461   |                    | -0.1218 to 0.6012  |
| 0.2558 to 0.7928   | 0.2530 to 0.7917   | -0.1218 to 0.6012  |                    |
| 0.6925 to 0.9227   | 0.4526 to 0.8461   | 0.02463 to 0.6521  | 0.4482 to 0.8617   |
| 0.2346 to 0.7588   | 0.2623 to 0.7711   | 0.07826 to 0.6820  | 0.6500 to 0.9206   |
| 0.4640 to 0.8541   | 0.2954 to 0.7907   | -0.03656 to 0.6244 | 0.4427 to 0.8599   |
| 0.2490 to 0.7653   | -0.05091 to 0.6065 | -0.09305 to 0.5791 | 0.1170 to 0.7329   |
| 0.6531 to 0.9113   | 0.7876 to 0.9488   | 0.4401 to 0.8416   | 0.5631 to 0.8966   |
| 0.5443 to 0.8775   | 0.3352 to 0.8016   | 0.05350 to 0.6685  | 0.5704 to 0.8987   |
| 0.6903 to 0.9221   | 0.5593 to 0.8823   | 0.2094 to 0.7474   | 0.5770 to 0.9006   |
| 0.08435 to 0.6852  | 0.02439 to 0.6520  | -0.1426 to 0.5447  | -0.05396 to 0.6430 |
| 0.02752 to 0.6538  | -0.03027 to 0.6195 | -0.1143 to 0.5646  | -0.06808 to 0.6347 |
| -0.4528 to 0.2734  | -0.3871 to 0.3455  | -0.2111 to 0.5038  | -0.3006 to 0.4820  |
| -0.4710 to 0.2519  | -0.4066 to 0.3250  | -0.1726 to 0.5331  | -0.2884 to 0.4921  |



| Mood                | Relations w/ others | Enjoyment of life  | Sleep              | BPI Physical interferences average |
|---------------------|---------------------|--------------------|--------------------|------------------------------------|
| -0.6274 to 0.01730  | -0.4384 to 0.2768   | -0.4485 to 0.2783  | -0.5266 to 0.1674  | -0.4147 to 0.3032                  |
| -0.1596 to 0.5324   | -0.3168 to 0.4022   | -0.1002 to 0.5838  | -0.06906 to 0.5949 | -0.1993 to 0.5023                  |
| 0.0003838 to 0.6380 | -0.04120 to 0.6127  | -0.08961 to 0.5908 | 0.1231 to 0.7055   | -0.2331 to 0.4753                  |
| 0.4349 to 0.8398    | 0.1530 to 0.7204    | 0.3766 to 0.8226   | 0.2977 to 0.7862   | 0.3515 to 0.8081                   |
| -0.1588 to 0.5329   | -0.3258 to 0.3938   | -0.2556 to 0.4679  | -0.07072 to 0.5938 | -0.2923 to 0.4246                  |
| 0.2481 to 0.7648    | 0.2023 to 0.7441    | 0.06696 to 0.6836  | 0.2567 to 0.7686   | 0.1709 to 0.7292                   |
| -0.1320 to 0.5523   | -0.08937 to 0.5815  | -0.09197 to 0.5893 | 0.08321 to 0.6846  | -0.2723 to 0.4422                  |
| 0.2826 to 0.7798    | 0.1064 to 0.6969    | 0.07818 to 0.6896  | 0.3661 to 0.8138   | 0.09854 to 0.6928                  |
| 0.1840 to 0.7354    | 0.08790 to 0.6871   | 0.1673 to 0.7342   | 0.1224 to 0.7051   | 0.2063 to 0.7459                   |
| 0.2305 to 0.7570    | 0.1135 to 0.7005    | 0.2271 to 0.7615   | 0.2258 to 0.7549   | 0.3654 to 0.8136                   |
| 0.3053 to 0.7894    | 0.1572 to 0.7225    | 0.2019 to 0.7502   | 0.3400 to 0.8035   | 0.2066 to 0.7461                   |
| 0.2959 to 0.7965    | 0.2453 to 0.7757    | 0.05765 to 0.6952  | -0.05747 to 0.6209 | 0.2061 to 0.7587                   |
| 0.1472 to 0.7245    | -0.01577 to 0.6369  | 0.1657 to 0.7403   | 0.005678 to 0.6495 | 0.009551 to 0.6517                 |
| 0.2223 to 0.7594    | 0.1842 to 0.7421    | -0.06068 to 0.6189 | 0.02580 to 0.6610  | 0.1962 to 0.7476                   |
| -0.1520 to 0.5480   | -0.05234 to 0.6147  | -0.3916 to 0.3543  | -0.2451 to 0.4766  | -0.1947 to 0.5165                  |
| 0.3409 to 0.8495    | 0.5452 to 0.9071    | 0.2744 to 0.8277   | -0.03702 to 0.6974 | 0.3325 to 0.8468                   |
| 0.2495 to 0.7655    | 0.01932 to 0.6491   | 0.2854 to 0.7865   | 0.1852 to 0.7360   | 0.2318 to 0.7576                   |
| 0.06307 to 0.6737   | -0.1422 to 0.5450   | 0.1575 to 0.7295   | 0.08174 to 0.6839  | 0.04091 to 0.6614                  |
| 0.01718 to 0.6561   | 0.08202 to 0.6916   | 0.1080 to 0.7126   | -0.09792 to 0.5853 | 0.05382 to 0.6765                  |
| 0.3522 to 0.8084    | 0.09862 to 0.6928   | 0.2725 to 0.7812   | -0.04735 to 0.6088 | 0.3981 to 0.8261                   |
| -0.4932 to 0.3658   | -0.5353 to 0.3153   | -0.5385 to 0.3352  | -0.4062 to 0.4565  | -0.5294 to 0.3227                  |
| -0.5699 to 0.2252   | -0.6458 to 0.1081   | -0.4902 to 0.3478  | -0.4960 to 0.3208  | -0.5522 to 0.2495                  |
| 0.6925 to 0.9227    | 0.2346 to 0.7588    | 0.4640 to 0.8541   | 0.2490 to 0.7653   | 0.6531 to 0.9113                   |
| 0.4526 to 0.8461    | 0.2623 to 0.7711    | 0.2954 to 0.7907   | -0.05091 to 0.6065 | 0.7876 to 0.9488                   |
| 0.02463 to 0.6521   | 0.07826 to 0.6820   | -0.03656 to 0.6244 | -0.09305 to 0.5791 | 0.4401 to 0.8416                   |
| 0.4482 to 0.8617    | 0.6500 to 0.9206    | 0.4427 to 0.8599   | 0.1170 to 0.7329   | 0.5631 to 0.8966                   |
|                     | 0.5453 to 0.8778    | 0.6167 to 0.9030   | 0.3985 to 0.8262   | 0.6717 to 0.9167                   |
| 0.5453 to 0.8778    |                     | 0.4248 to 0.8403   | 0.2107 to 0.7479   | 0.4778 to 0.8550                   |
| 0.6167 to 0.9030    | 0.4248 to 0.8403    |                    | 0.3672 to 0.8190   | 0.4790 to 0.8593                   |
| 0.3985 to 0.8262    | 0.2107 to 0.7479    | 0.3672 to 0.8190   |                    | 0.1727 to 0.7301                   |
| 0.6717 to 0.9167    | 0.4778 to 0.8550    | 0.4790 to 0.8593   | 0.1727 to 0.7301   |                                    |
| 0.8440 to 0.9633    | 0.6759 to 0.9180    | 0.8027 to 0.9540   | 0.6697 to 0.9162   | 0.5949 to 0.8936                   |
| 0.8551 to 0.9660    | 0.6477 to 0.9097    | 0.7490 to 0.9402   | 0.5151 to 0.8678   | 0.8266 to 0.9589                   |
| 0.1683 to 0.7279    | -0.03634 to 0.6157  | 0.1116 to 0.7069   | -0.03523 to 0.6164 | 0.09238 to 0.6895                  |
| 0.09731 to 0.6921   | -0.08824 to 0.5823  | 0.1214 to 0.7118   | 0.01408 to 0.6460  | 0.05916 to 0.6716                  |
| -0.4306 to 0.2987   | -0.4158 to 0.3150   | -0.4370 to 0.3054  | -0.3948 to 0.3375  | -0.3317 to 0.4003                  |
| -0.4500 to 0.2767   | -0.4366 to 0.2919   | -0.4100 to 0.3349  | -0.3482 to 0.3845  | -0.3328 to 0.3993                  |

| BPI Psychological interferences average | BPI Average pain score |
|-----------------------------------------|------------------------|
| -0.5419 to 0.1465                       | -0.4918 to 0.2127      |
| -0.1145 to 0.5645                       | -0.1118 to 0.5663      |
| 0.06006 to 0.6721                       | -0.002879 to 0.6360    |
| 0.4573 to 0.8478                        | 0.5411 to 0.8764       |
| -0.1758 to 0.5203                       | -0.1731 to 0.5223      |
| 0.3039 to 0.7888                        | 0.3411 to 0.8040       |
| -0.006583 to 0.6338                     | -0.04200 to 0.6122     |
| 0.3270 to 0.7983                        | 0.3118 to 0.7921       |
| 0.2404 to 0.7614                        | 0.3168 to 0.7941       |
| 0.3128 to 0.7925                        | 0.4429 to 0.8426       |
| 0.3786 to 0.8187                        | 0.4247 to 0.8360       |
| 0.2124 to 0.7614                        | 0.2460 to 0.7760       |
| 0.1539 to 0.7277                        | 0.1281 to 0.7151       |
| 0.1639 to 0.7325                        | 0.2085 to 0.7532       |
| -0.2091 to 0.5054                       | -0.1855 to 0.5235      |
| 0.4059 to 0.8693                        | 0.4027 to 0.8683       |
| 0.2804 to 0.7789                        | 0.4152 to 0.8325       |
| 0.1206 to 0.7042                        | 0.1984 to 0.7422       |
| 0.08777 to 0.6946                       | 0.1646 to 0.7328       |
| 0.2517 to 0.7664                        | 0.4097 to 0.8305       |
| -0.4948 to 0.3641                       | -0.5574 to 0.2866      |
| -0.5662 to 0.2304                       | -0.6033 to 0.1763      |
| 0.5443 to 0.8775                        | 0.6903 to 0.9221       |
| 0.3352 to 0.8016                        | 0.5593 to 0.8823       |
| 0.05350 to 0.6685                       | 0.2094 to 0.7474       |
| 0.5704 to 0.8987                        | 0.5770 to 0.9006       |
| 0.8440 to 0.9633                        | 0.8551 to 0.9660       |
| 0.6759 to 0.9180                        | 0.6477 to 0.9097       |
| 0.8027 to 0.9540                        | 0.7490 to 0.9402       |
| 0.6697 to 0.9162                        | 0.5151 to 0.8678       |
| 0.5949 to 0.8936                        | 0.8266 to 0.9589       |
|                                         | 0.9189 to 0.9815       |
| 0.9189 to 0.9815                        |                        |
| 0.1281 to 0.7080                        | 0.1829 to 0.7349       |
| 0.1132 to 0.7004                        | 0.1720 to 0.7297       |
| -0.4154 to 0.3155                       | -0.3855 to 0.3472      |
| -0.4039 to 0.3278                       | -0.3687 to 0.3643      |

**Supplementary Figure S1.**

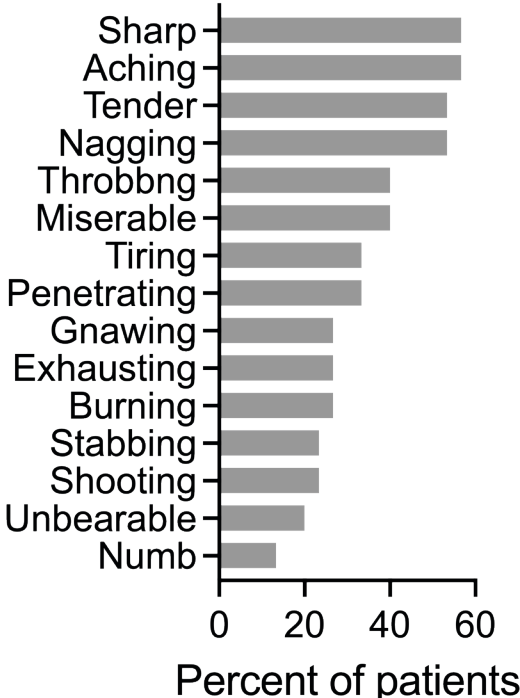

**Figure S1. Quality of pretreatment oral cancer pain.** Percent of newly diagnosed patients reporting the quality of their pain according to each of the descriptors provided on the BPI.
